# Supplementary material for: First-line selective internal radiotherapy plus chemotherapy versus chemotherapy alone in patients with liver metastases from colorectal cancer (FOXFIRE, SIRFLOX, and FOXFIRE-Global): a combined analysis of three multicentre, randomised, phase 3 trials
Source: PubMed Central journal article supplement — Lancet Oncol. 2017 Sep;18(9):1159–71. doi: 10.1016/S1470-2045(17)30457-6 (PMC5593813; doi:10.1016/s1470-2045(17)30457-6), 2017-09
Supplement: mmc1.pdf [file mmc1.pdf]

**SUPPLEMENTARY MATERIAL TO:**

**Combined analysis of the FOXFIRE, SIFLOX and FOXFIRE-Global prospective randomised studies of first-line selective internal radiotherapy in patients with liver metastases from colorectal cancer.**

**Wasan HS, Gibbs P, et al. *The Lancet Oncology*, 2017.**

### **Supplementary Methods:**

Permitted dose reductions/interruptions

Frequency and type of laboratory monitoring

Switching to other protocol therapies

### **Supplementary Figures:**

**Figure S1:** Kaplan-Meier overall survival curves by treatment arm for FOXFIRE, SIRFLOX and FOXFIRE-Global

**Figure S2:** A. Waterfall plot of largest reduction in the sum of longest diameters of target lesions over the entire study duration by treatment arm, and B. Forest plot of response rate odds ratios

**Figure S3:** Odds ratios for undergoing a resection (n=1103)

**Figure S4:** Percentage of patients with grade 3-5 AEs per cycle (n=1078)

**Figure S5:** Odds ratios for experiencing a grade 3-5 adverse event (n=1078)

### **Supplementary Tables:**

**Table S1:** Recruitment dates, follow-up dates and objectives for the FOXFIRE, SIRFLOX and FOXFIRE-Global trials

**Table S2:** Reasons for treatment discontinuation in FOXFIRE (n=364)

**Table S3:** Baseline characteristics of participants in the FOXFIRE (n=364), SIRFLOX (n=530) and FOXFIRE-Global (n=209) trials

**Table S4:** Treatment exposure subsequent to trial-specified treatment (n=1103)

**Table S5:** Cause-specific and sub-distribution hazard ratios for liver-specific progression-free survival (n=1103)

**Table S6:** Best response (n=1103)

**Table S7:** Best response achieved over the entire study period by individual trial

**Table S8:** Best liver-specific response achieved over the entire study period

**Table S9:** Worst reported adverse events (not cumulative) sorted by prevalence of patients with adverse events

**Table S10:** Grade 5 AEs in the as-treated population during the main safety window (n=1078)

**Table S11:** Summary of patients experiencing at least one SAE and its relatedness to treatment

**Table S12:** Cause of death by treatment group (n=844)

**Table S13:** HRQoL summaries: mean EQ-5D utility values at baseline and follow-up points, combined FOXFIRE, SIRFLOX and FOXFIRE-Global trials, using US utility tariff

**Table S14:** List of sites, principal investigators and number of patients recruited

### **List of Investigators/Trial Committees**

## **Supplementary Methods:**

### **Permitted dose reductions/interruptions**

#### **The FOXFIRE Trial Protocol stated the following:**

As this is an ‘intention to treat’ study, empirical dosage modifications to chemotherapy in line with standard clinical care are acceptable. The justification for the dose modification should be noted in the patient hospital records and recorded on the relevant case report form (CRF). The toxicity of each cycle of chemotherapy must be recorded before the administration of the next one and graded according to the current version of the Common Terminology Criteria for Adverse Events (CTCAE) V3.0.

Dose modifications will be made according to the worst toxicity observed during the previous cycle. Treatment should be delayed until full recovery of stomatitis or diarrhoea, and recovery to  $\leq$ CTCAE grade 2 skin or other toxicity. Blood counts should have recovered to:

Neutrophils >  $1.0 \times 10^9/L$

Platelets >  $75 \times 10^9/L$

The recommended initial dose modifications in the event of toxicity due to OxMdG chemotherapy are detailed in the following tables. Subsequent dose modifications can be made by reducing the concentration of the active constituents by 25%. All treatment modifications should be documented on the Treatment Form CRF.

**Table: Recommended Dose Modification due to OxMdG Toxicity (excluding neurosensory toxicity)**

| Type of Toxicity (CTCAE)                                              | Initial Doses (mg/m <sup>2</sup> /cycle)                                                         |                                |                             |
|-----------------------------------------------------------------------|--------------------------------------------------------------------------------------------------|--------------------------------|-----------------------------|
|                                                                       | 5-FU<br>IV bolus                                                                                 | 5-FU<br>IV continuous infusion | Oxaliplatin                 |
|                                                                       | 400                                                                                              | 2400                           | 85                          |
|                                                                       | Dose modifications of study drugs (mg/m <sup>2</sup> /cycle)<br>(LV dose should not be modified) |                                |                             |
| Haemoglobin (any grade)                                               | None                                                                                             | None                           | none                        |
| White blood cells (any grade)                                         | None                                                                                             | None                           | none                        |
| Neutrophils grade 3 or 4                                              | 300                                                                                              | 1800                           | 65                          |
| Platelets grade 3 or 4                                                | 300                                                                                              | 1800                           | 65                          |
| Nausea and/or vomiting grade 4 despite adequate anti-emetic treatment | Stop treatment. Patient off study due to toxicity                                                |                                |                             |
| Diarrhoea grade 3                                                     | 300                                                                                              | 1800                           | none                        |
| Diarrhoea grade 4*                                                    | 300                                                                                              | 1800                           | 65                          |
| Stomatitis grade 3                                                    | 300                                                                                              | 1800                           | none                        |
| Stomatitis grade 4*                                                   | 300                                                                                              | 1800                           | 65                          |
| Heart ≥ grade 2                                                       | Stop treatment. Patient off study due to toxicity                                                |                                |                             |
| Skin grade 3 or 4                                                     | 300                                                                                              | 1800                           | None                        |
| Allergy grade 3 or 4                                                  | Stop treatment. Patient off study due to toxicity                                                |                                |                             |
| Neurocerebellar                                                       | Stop treatment. Patient off study due to toxicity                                                |                                |                             |
| Neurosensory: specific adaptation according to symptomatology         | None                                                                                             | None                           | As described in table below |
| Alopecia (any grade)                                                  | None                                                                                             | None                           | None                        |
| Local Intolerance (any grade)                                         | None                                                                                             | None                           | None                        |
| Other toxicity clearly drug related:                                  |                                                                                                  |                                |                             |
| - grade 1 or 2                                                        | none                                                                                             | none                           | none                        |
| - grade 3                                                             | 300                                                                                              | 1800                           | 65                          |
| - grade 4                                                             | Stop treatment                                                                                   | Stop treatment                 | Stop treatment              |

\*or repeated grade 3 after 5-FU dose reduction

The oxaliplatin dose should be reduced in the next cycle according to the specific grade of peripheral neuropathy observed after a given cycle of chemotherapy (see following table).

**Table: Dose Modification of Oxaliplatin Due to Peripheral Neuropathy**

| Type of Toxicity                                           | Dose modification of Oxaliplatin (mg/m <sup>2</sup> /cycle) |                                     |                                         |
|------------------------------------------------------------|-------------------------------------------------------------|-------------------------------------|-----------------------------------------|
|                                                            | Duration of Peripheral Neuropathy                           |                                     |                                         |
|                                                            | ≤ 7 days                                                    | Non persistent<br>> 7 and < 14 days | Persistent between courses              |
| Cold-related dysaesthesia                                  | None                                                        | None                                | None                                    |
| Paraesthesia                                               | None                                                        | None                                | Stop until recovery, then restart at 75 |
| Paraesthesia associated with pain or functional impairment | None                                                        | 75                                  | Stop treatment                          |

If the dose of oxaliplatin must be reduced due to one or more of the toxicities listed in the above tables, then escalation of the dose back to the starting level is not permitted. However, temporary reductions in dose are permissible at investigator discretion for patients in the SIRT arm *if* dose reduction was made due to low white blood cell counts between cycles 2-5 possibly due to the myelosuppressive effect of SIRT.

*Chronic neuropathy*

Upon evidence of chronic neuropathy, treatment is to continue with 5-FU/LV alone until such time as any of the following conditions are met:

- Objective evidence of tumour progression at any site as determined by CT scan and/or X-ray and/or ultrasound and/or clinical examination.
- Patient's request.
- Complete radiological response to therapy.
- Unacceptable toxicity as determined by objective evidence, clinical judgement or patient request.

Oxaliplatin may be reintroduced to the treatment, subject to investigator discretion, at any time prior to objective evidence of disease progression.

**The SIRFLOX/FF-Global Trial Protocols stated the following:**

The toxicity of each cycle of chemotherapy must be recorded before the administration of the next one and graded according to the NCI Common Toxicity Criteria (NCI-CTC) version 3.0.

Dose modifications will be made according to the worst toxicity observed during the previous cycle. Treatment should be delayed until full recovery of stomatitis or diarrhoea, and recovery to ≤ NCI grade 2 skin or other toxicity. Blood counts should have recovered to:

Neutrophils > 1 x 10<sup>9</sup>/L  
 Platelets > 75 x 10<sup>9</sup>/L

The recommended initial dose modifications in the event of toxicity due to FOLFOX6m chemotherapy are detailed in the following tables. Subsequent dose modifications can be made by reducing the concentration of the active constituents by 25%. All treatment modifications should be documented on the chemotherapy and toxicity flow sheet.

**Table: Recommended Dose Modification Due to FOLFOX6m Toxicity (excludes neurosensory toxicity)**

| Type of Toxicity (NCI-CTC Grade)                                      | Initial Doses (mg/m <sup>2</sup> /cycle)                                                         |                                |             |
|-----------------------------------------------------------------------|--------------------------------------------------------------------------------------------------|--------------------------------|-------------|
|                                                                       | 5-FU<br>IV bolus                                                                                 | 5-FU<br>IV continuous infusion | Oxaliplatin |
|                                                                       | 400                                                                                              | 2400                           | 85          |
|                                                                       | Dose modifications of study drugs (mg/m <sup>2</sup> /cycle)<br>(LV dose should not be modified) |                                |             |
| Hemoglobin (any grade)                                                | none                                                                                             | none                           | none        |
| White blood cells (any grade)                                         | none                                                                                             | none                           | none        |
| Neutrophils grade 3 or 4                                              | 300                                                                                              | 1800                           | 65          |
| Platelets grade 3 or 4                                                | 300                                                                                              | 1800                           | 65          |
| Nausea and/or vomiting grade 4 despite adequate anti-emetic treatment | Stop treatment.                                                                                  |                                |             |
| Diarrhoea grade 3                                                     | 300                                                                                              | 1800                           | none        |
| Diarrhoea grade 4*                                                    | 300                                                                                              | 1800                           | 65          |
| Stomatitis grade 3                                                    | 300                                                                                              | 1800                           | none        |
| Stomatitis grade 4*                                                   | 300                                                                                              | 1800                           | 65          |
| Heart ≥ grade 2                                                       | Stop treatment.                                                                                  |                                |             |

|                                                               |                 |                |                         |
|---------------------------------------------------------------|-----------------|----------------|-------------------------|
| Skin grade 3 or 4                                             | 300             | 1800           | none                    |
| Allergy grade 3 or 4                                          | Stop treatment. |                |                         |
| Neurocerebellar                                               | Stop treatment. |                |                         |
| Neurosensory: specific adaptation according to symptomatology | none            | none           | As described in Table B |
| Alopecia (any grade)                                          | none            | none           | none                    |
| Local intolerance (any grade)                                 | none            | none           | none                    |
| Other toxicity clearly drug related:                          |                 |                |                         |
| - grade 1 or 2                                                | none            | none           | none                    |
| - grade 3                                                     | 300             | 1800           | 65                      |
| - grade 4                                                     | Stop treatment  | Stop treatment | Stop treatment          |

\*or repeated grade 3 after 5-FU dose reduction

The oxaliplatin dose should be reduced in the next cycle according to the specific grade of peripheral neuropathy observed after a given cycle of chemotherapy (Table B).

**Table: Recommended Dose Modification of Oxaliplatin Due to Peripheral Neuropathy**

| Dose modification of oxaliplatin (mg/m <sup>2</sup> /cycle) |                                   |                                     |                                         |
|-------------------------------------------------------------|-----------------------------------|-------------------------------------|-----------------------------------------|
| Type of Toxicity                                            | Duration of Peripheral Neuropathy |                                     |                                         |
|                                                             | ≤ 7 days                          | Non persistent<br>> 7 and < 14 days | Persistent between courses              |
| Cold-related dysaesthesia                                   | none                              | none                                | none                                    |
| Paraesthesia                                                | none                              | none                                | Stop until recovery, then restart at 75 |
| Paraesthesia associated with pain or functional impairment  | none                              | 75                                  | Stop treatment                          |

If the dose of oxaliplatin must be reduced due to one or more of the toxicities listed in Tables A or B, above, then escalation of the dose back to the starting level is not permitted. However, temporary reductions in dose are permissible at investigator discretion for patients in the SIRT arm when toxicities are clearly attributable to the implantation of SIRT microspheres.

#### *Modification of Infusion Duration of Oxaliplatin*

In the case of Laryngeal Spasm Syndrome or in the case of NCI grade ≤ 2 allergy, increase the oxaliplatin infusion time from 2 to 6 hours.

#### *Schedule Modifications*

The dosage schedule should be followed. A delay of 7 days or less in the start date of cycles of chemotherapy is acceptable. If the start of a chemotherapy cycle has to be delayed for more than 3 consecutive weeks due to the same chemotherapy related toxicity, then treatment must be discontinued due to toxicity. The patient will continue to be followed as per protocol, including 8-weekly disease assessments.

Delays of longer than 3 weeks are permitted for non-chemotherapy related toxicities, adverse events or elective surgery. Chemotherapy must be recommenced at the earliest opportunity and continued as per protocol, including 8-weekly study assessments.

**Frequency and type of laboratory monitoring**

**FOXFIRE Trial Protocol:**

|                                                                    |                                                                                                                                           |
|--------------------------------------------------------------------|-------------------------------------------------------------------------------------------------------------------------------------------|
| FBC & platelets*                                                   | Each week that chemotherapy is administered.                                                                                              |
| Bilirubin, ALT, AST, ALP, LDH, Urea, Creatinine, Protein, Albumin* | Each week that chemotherapy is administered. If abnormal at completion of protocol therapy, continue to check every 4 weeks until normal. |
| CEA                                                                | 4 weekly while on chemotherapy then 8 weekly up to 18 months.                                                                             |

\* These tests need only be performed while the patient is receiving chemotherapy

**SIRFLOX/FF-Global Trial Protocols:**

|                  |                                                                                                                 |
|------------------|-----------------------------------------------------------------------------------------------------------------|
| Haematological** | Prior to each cycle of chemotherapy administration or 8 *** weekly if the patient is off protocol chemotherapy. |
| Biochemistry**   | Prior to each cycle of chemotherapy administration or 8 ***weekly if the patient is off protocol chemotherapy   |
| CEA              | 4 weekly until progression.                                                                                     |

\*\* *These tests need only be performed while the patient is receiving chemotherapy.*

\*\*\* In case of > 12 months follow up after complete resection of disease or lasting CR (see above) the interval may be increased to 12 weeks coinciding with imaging visits.

## **Switching to other protocol therapies**

### **FOXFIRE Trial:**

In FOXFIRE, the protocol stated: If a patient requires removal of a long line due to infection or venous thrombosis or other complication, and should the treating oncologist wish to consider capecitabine therapy as an alternative to line re-insertion for infusional 5-FU, then the following conditions will apply:

- APPROVAL MUST BE OBTAINED from the FOXFIRE trial office before capecitabine is substituted for 5-FU, and investigators must follow the guidelines in Appendix 11 for the treatment schedule to be used.
- Capecitabine should be continued until the patient has completed 6 months of chemotherapy in total, which includes the protocol chemotherapy received before the capecitabine was started.
- For patients in Arm A of the trial, substitution of therapy can be performed at any time following a line complication. The FOXFIRE trial office must be informed immediately.
- For patients in Arm B of the trial, substitution of therapy can be performed only once the patient has reached cycle 6 of treatment. Prior to cycle 6, OxMdG must be continued as per protocol. The FOXFIRE trial office must be informed immediately.

### **SIRFLOX/FF-Global Trials:**

In SIRFLOX and FOXFIRE-Global, no switching to other protocol therapy was permitted.



## Supplementary Figures

Figure S1: Kaplan-Meier overall survival curves by treatment arm for FOXFIRE, SIRFLOX and FOXFIRE-Global

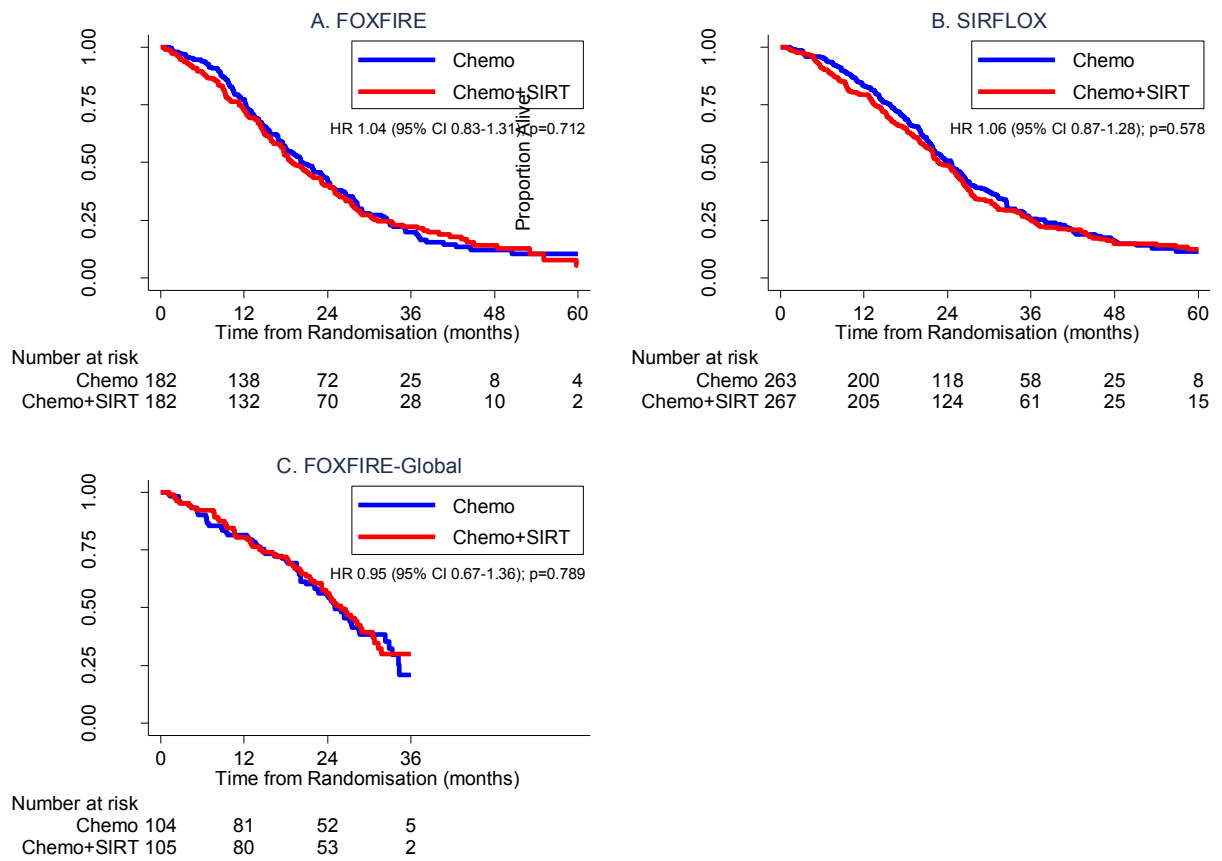

Figure S2: A. Waterfall plot of largest reduction in the sum of longest diameters of target lesions over the entire study duration by treatment arm, and B. Forest plot of response rate odds ratios

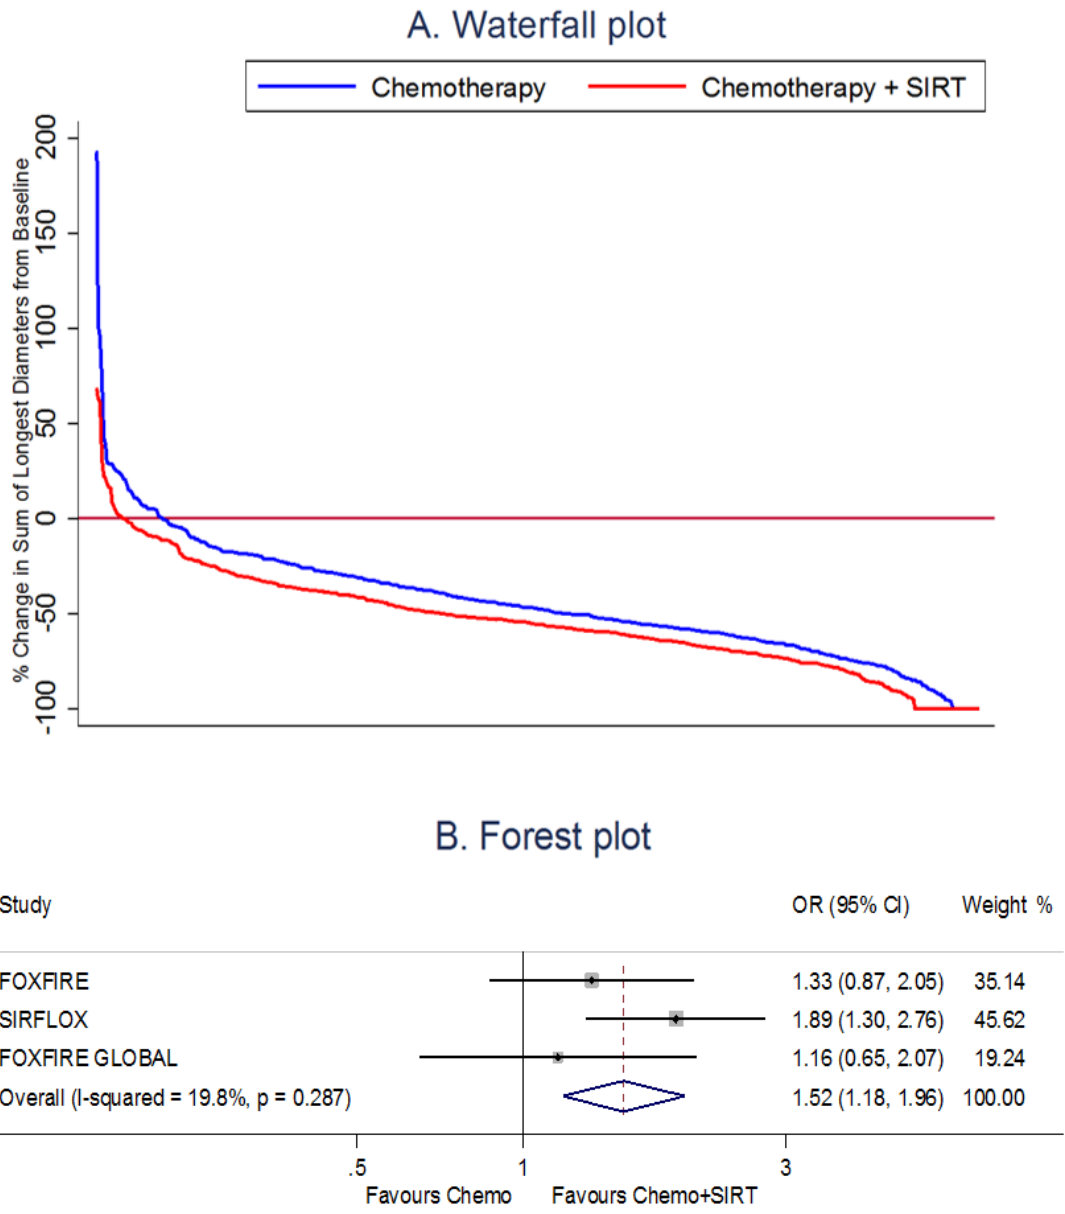

**Figure S3: Odds ratios for undergoing a resection (n=1103)**

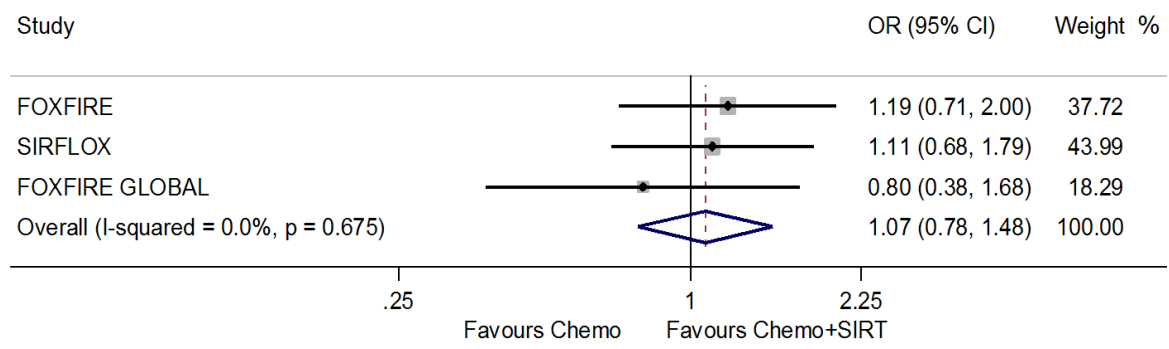

**Figure S4: Percentage of patients with grade 3-5 AEs per cycle (n=1078)**

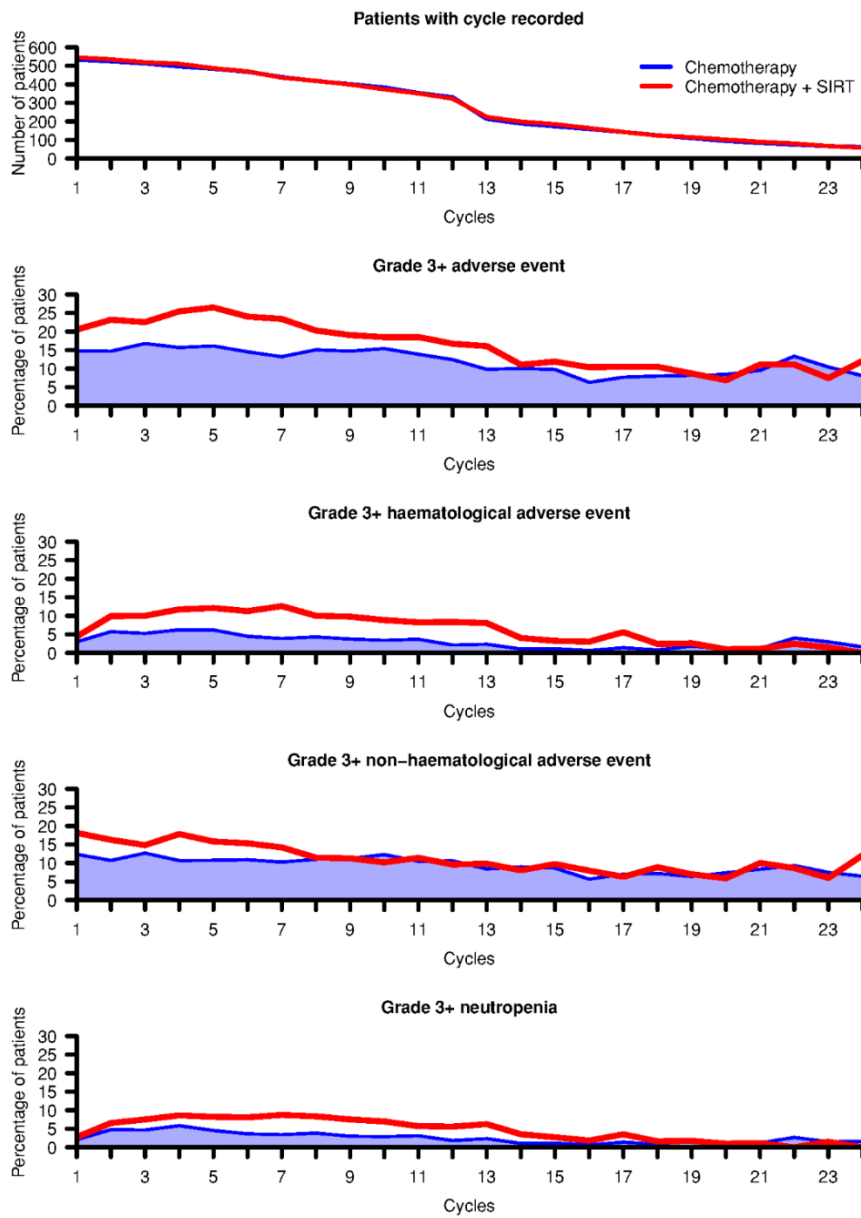

**Figure S5: Odds ratios for experiencing a grade 3-5 adverse event (n=1078)**

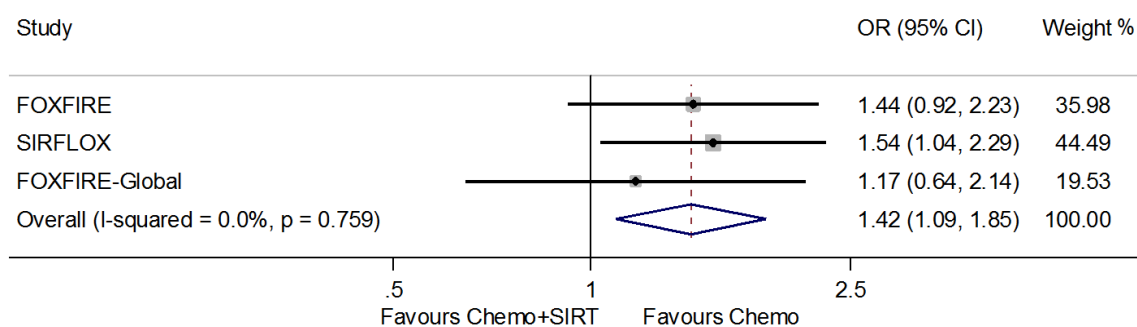

**Supplementary Tables**

**Table S1. Recruitment dates, follow-up dates and objectives for the FOXFIRE, SIRFLOX and FOXFIRE-Global trials**

|                               | FOXFIRE                                                | SIRFLOX                                   | FOXFIRE-Global                            |
|-------------------------------|--------------------------------------------------------|-------------------------------------------|-------------------------------------------|
| Start of recruitment          | 13Nov2009                                              | 11Oct2006                                 | 20May2013                                 |
| End of recruitment            | 31Oct2014                                              | 25Apr2013                                 | 23Dec2014                                 |
| End of follow-up              | 31Oct2016                                              | 01Jun2016                                 | 30Nov2016                                 |
| Number of recruiting centres  | 25                                                     | 87                                        | 67                                        |
| Primary objective             | Overall survival                                       | Progression-free survival                 | Overall survival                          |
| Secondary objectives          | Progression-free survival                              | Overall survival                          | Progression-free survival                 |
|                               | Progression-free survival in the liver                 | Progression-free survival in the liver    | Progression-free survival in the liver    |
|                               | Toxicity and safety                                    | Toxicity and safety                       | Toxicity and safety                       |
|                               | Tumour response rate                                   | Tumour response rate                      | Tumour response rate                      |
|                               | Quality of Life                                        | Quality of Life                           | Quality of Life                           |
|                               | Liver resection rate                                   | Liver resection rate                      | Liver resection rate                      |
|                               |                                                        | Hepatic and extra-hepatic recurrence rate | Hepatic and extra-hepatic recurrence rate |
|                               | Health costs/economics                                 |                                           | Health economics                          |
|                               | Proportion of patients receiving second line treatment |                                           |                                           |
| Time to second line treatment |                                                        |                                           |                                           |

**Table S2. Reasons for treatment discontinuation in FOXFIRE (n=364)**

|                                  | FOXFIRE              |                             |                    |
|----------------------------------|----------------------|-----------------------------|--------------------|
|                                  | Chemotherapy (n=182) | Chemotherapy + SIRT (n=182) | Overall (n=364)    |
| <b>Completed Study Treatment</b> | <b>86 (47.3%)</b>    | <b>77 (42.3%)</b>           | <b>163 (44.8%)</b> |
| Treatment not Started            | 3 (1.6%)             | 2 (1.1%)                    | 5 (1.4%)           |
| Patient Decision                 | 7 (3.8%)             | 10 (5.5%)                   | 17 (4.7%)          |
| Clinical Decision                | 25 (13.7%)           | 26 (14.3%)                  | 51 (14.0%)         |
| Disease Progression              | 28 (15.4%)           | 19 (10.4%)                  | 47 (12.9%)         |
| Adverse Event                    | 6 (3.3%)             | 9 (4.9%)                    | 15 (4.1%)          |
| Serious Adverse Event            | 9 (4.9%)             | 16 (8.8%)                   | 25 (6.9%)          |
| Death                            | 6 (3.3%)             | 9 (4.9%)                    | 15 (4.1%)          |
| Protocol Violation/Ineligibility |                      | 1 (0.5%)                    | 1 (0.3%)           |
| Other                            | 5 (2.7%)             | 6 (3.3%)                    | 11 (3.0%)          |
| Unknown                          | 7 (3.8%)             | 7 (3.8%)                    | 14 (3.8%)          |

**Table S3: Baseline characteristics of participants in the FOXFIRE (n=364), SIRFLOX (n=530) and FOXFIRE-Global (n=209) trials**

|                                                                                 |                                | FOXFIRE              |                             |                  | SIRFLOX              |                             |                  | FOXFIRE GLOBAL       |                             |                  |
|---------------------------------------------------------------------------------|--------------------------------|----------------------|-----------------------------|------------------|----------------------|-----------------------------|------------------|----------------------|-----------------------------|------------------|
|                                                                                 |                                | Chemotherapy (n=182) | Chemotherapy + SIRT (n=182) | Overall (n=364)  | Chemotherapy (n=263) | Chemotherapy + SIRT (n=267) | Overall (n=530)  | Chemotherapy (n=104) | Chemotherapy + SIRT (n=105) | Overall (n=209)  |
| Age at randomisation (years) <sup>1</sup>                                       |                                | 62.0 (30.0,84.0)     | 63.5 (30.0,83.0)            | 62.5 (30.0,84.0) | 63.3 (23.1,89.0)     | 63.4 (28.4,80.8)            | 63.4 (23.1,89.0) | 63.0 (37.6,82.3)     | 63.1 (29.2,89.6)            | 63.1 (29.2,89.6) |
| Time since diagnosis of primary tumor to randomisation (months) <sup>2</sup>    |                                | 1.5 (1.0,2.6)        | 1.5 (1.1,2.7)               | 1.5 (1.0,2.7)    | 1.3 (0.7,2.3)        | 1.3 (0.8,2.1)               | 1.3 (0.8,2.2)    | 1.3 (0.8,2.0)        | 1.1 (0.7,2.0)               | 1.2 (0.7,2.0)    |
| Time since diagnosis of liver metastases to randomisation (months) <sup>2</sup> |                                | 1.2 (0.9,1.9)        | 1.3 (0.9,1.9)               | 1.3 (0.9,1.9)    | 1.2 (0.7,1.8)        | 1.2 (0.7,1.8)               | 1.2 (0.7,1.8)    | 1.2 (0.7,1.7)        | 1.0 (0.6,1.7)               | 1.1 (0.7,1.7)    |
| Gender                                                                          | Male                           | 127 (69.8%)          | 117 (64.3%)                 | 244 (67.0%)      | 174 (66.2%)          | 182 (68.2%)                 | 356 (67.2%)      | 60 (57.7%)           | 64 (61.0%)                  | 124 (59.3%)      |
|                                                                                 | Female                         | 55 (30.2%)           | 65 (35.7%)                  | 120 (33.0%)      | 88 (33.5%)           | 85 (31.8%)                  | 173 (32.6%)      | 44 (42.3%)           | 41 (39.0%)                  | 85 (40.7%)       |
|                                                                                 | Missing                        |                      |                             |                  | 1 (0.4%)             |                             | 1 (0.2%)         |                      |                             |                  |
| WHO performance status                                                          | 0                              | 119 (65.4%)          | 117 (64.3%)                 | 236 (64.8%)      | 175 (66.5%)          | 176 (65.9%)                 | 351 (66.2%)      | 53 (51.0%)           | 61 (58.1%)                  | 114 (54.5%)      |
|                                                                                 | 1                              | 63 (34.6%)           | 64 (35.2%)                  | 127 (34.9%)      | 87 (33.1%)           | 90 (33.7%)                  | 177 (33.4%)      | 50 (48.1%)           | 44 (41.9%)                  | 94 (45.0%)       |
|                                                                                 | Missing                        |                      | 1 (0.5%)                    | 1 (0.3%)         | 1 (0.4%)             | 1 (0.4%)                    | 2 (0.4%)         | 1 (1.0%)             |                             | 1 (0.5%)         |
| Primary tumor site                                                              | Colon                          | 127 (69.8%)          | 134 (73.6%)                 | 261 (71.7%)      | 191 (72.6%)          | 215 (80.5%)                 | 406 (76.6%)      | 74 (71.2%)           | 72 (68.6%)                  | 146 (69.9%)      |
|                                                                                 | Rectum                         | 55 (30.2%)           | 48 (26.4%)                  | 103 (28.3%)      | 60 (22.8%)           | 45 (16.9%)                  | 105 (19.8%)      | 22 (21.2%)           | 23 (21.9%)                  | 45 (21.5%)       |
|                                                                                 | Not Categorisable <sup>3</sup> |                      |                             |                  | 5 (1.9%)             | 2 (0.7%)                    | 7 (1.3%)         | 3 (2.9%)             | 3 (2.9%)                    | 6 (2.9%)         |
|                                                                                 | Missing                        |                      |                             |                  | 7 (2.7%)             | 5 (1.9%)                    | 12 (2.3%)        | 5 (4.8%)             | 7 (6.7%)                    | 12 (5.7%)        |
| Primary tumor in situ?                                                          | Yes                            | 122 (67.0%)          | 109 (59.9%)                 | 231 (63.5%)      | 121 (46.0%)          | 119 (44.6%)                 | 240 (45.3%)      | 59 (56.7%)           | 50 (47.6%)                  | 109 (52.2%)      |
|                                                                                 | No                             | 60 (33.0%)           | 72 (39.6%)                  | 132 (36.3%)      | 141 (53.6%)          | 148 (55.4%)                 | 289 (54.5%)      | 45 (43.3%)           | 55 (52.4%)                  | 100 (47.8%)      |
|                                                                                 | Missing                        |                      | 1 (0.5%)                    | 1 (0.3%)         | 1 (0.4%)             |                             | 1 (0.2%)         |                      |                             |                  |
| Prior adjuvant chemotherapy?                                                    | Yes                            | 9 (4.9%)             | 14 (7.7%)                   | 23 (6.3%)        | 16 (6.1%)            | 13 (4.9%)                   | 29 (5.5%)        | 3 (2.9%)             | 4 (3.8%)                    | 7 (3.3%)         |
|                                                                                 | No                             | 173 (95.1%)          | 168 (92.3%)                 | 341 (93.7%)      | 246 (93.5%)          | 254 (95.1%)                 | 500 (94.3%)      | 101 (97.1%)          | 101 (96.2%)                 | 202 (96.7%)      |
|                                                                                 | Missing                        |                      |                             |                  | 1 (0.4%)             |                             | 1 (0.2%)         |                      |                             |                  |
| Metastases present at initial diagnosis?                                        | Yes - Synchronous              | 154 (84.6%)          | 150 (82.4%)                 | 304 (83.5%)      | 227 (86.3%)          | 240 (89.9%)                 | 467 (88.1%)      | 94 (90.4%)           | 93 (88.6%)                  | 187 (89.5%)      |
|                                                                                 | No - Metachronous              | 27 (14.8%)           | 30 (16.5%)                  | 57 (15.7%)       | 34 (12.9%)           | 26 (9.7%)                   | 60 (11.3%)       | 10 (9.6%)            | 12 (11.4%)                  | 22 (10.5%)       |
|                                                                                 | Missing                        | 1 (0.5%)             | 2 (1.1%)                    | 3 (0.8%)         | 2 (0.8%)             | 1 (0.4%)                    | 3 (0.6%)         |                      |                             |                  |
| Extra-hepatic metastases status <sup>4</sup>                                    | No                             | 122 (67.0%)          | 121 (66.5%)                 | 243 (66.8%)      | 159 (60.5%)          | 161 (60.3%)                 | 320 (60.4%)      | 77 (74.0%)           | 73 (69.5%)                  | 150 (71.8%)      |
|                                                                                 | Yes                            | 60 (33.0%)           | 61 (33.5%)                  | 121 (33.2%)      | 104 (39.5%)          | 106 (39.7%)                 | 210 (39.6%)      | 27 (26.0%)           | 32 (30.5%)                  | 59 (28.2%)       |
| Extra-hepatic metastases sites                                                  | Lungs                          | 26 (43.3%)           | 19 (31.1%)                  | 45 (37.2%)       | 35 (33.7%)           | 40 (37.7%)                  | 75 (35.7%)       | 11 (40.7%)           | 12 (37.5%)                  | 23 (39.0%)       |
|                                                                                 | Lungs & lymph nodes            | 4 (6.7%)             | 4 (6.6%)                    | 8 (6.6%)         | 18 (17.3%)           | 14 (13.2%)                  | 32 (15.2%)       | 1 (3.7%)             | 5 (15.6%)                   | 6 (10.2%)        |
|                                                                                 | Lungs & Other                  | 1 (1.7%)             |                             | 1 (0.8%)         | 1 (1.0%)             |                             | 1 (0.5%)         | 1 (3.7%)             |                             | 1 (1.7%)         |

|                                                        |                             | FOXFIRE              |                             |                 | SIRFLOX              |                             |                 | FOXFIRE GLOBAL       |                             |                 |
|--------------------------------------------------------|-----------------------------|----------------------|-----------------------------|-----------------|----------------------|-----------------------------|-----------------|----------------------|-----------------------------|-----------------|
|                                                        |                             | Chemotherapy (n=182) | Chemotherapy + SIRT (n=182) | Overall (n=364) | Chemotherapy (n=263) | Chemotherapy + SIRT (n=267) | Overall (n=530) | Chemotherapy (n=104) | Chemotherapy + SIRT (n=105) | Overall (n=209) |
|                                                        | Lymph nodes                 | 18 (30.0%)           | 21 (34.4%)                  | 39 (32.2%)      | 46 (44.2%)           | 45 (42.5%)                  | 91 (43.3%)      | 14 (51.9%)           | 12 (37.5%)                  | 26 (44.1%)      |
|                                                        | Lymph nodes & Other         | 2 (3.3%)             |                             | 2 (1.7%)        | 2 (1.9%)             | 2 (1.9%)                    | 4 (1.9%)        |                      | 1 (3.1%)                    | 1 (1.7%)        |
|                                                        | Other                       | 5 (8.3%)             | 5 (8.2%)                    | 10 (8.3%)       |                      | 2 (1.9%)                    | 2 (1.0%)        |                      | 2 (6.2%)                    | 2 (3.4%)        |
|                                                        | Missing                     | 4 (6.7%)             | 12 (19.7%)                  | 16 (13.2%)      | 2 (1.9%)             | 3 (2.8%)                    | 5 (2.4%)        |                      |                             |                 |
| Degree of liver involvement <sup>4</sup>               | <=25%                       | 114 (62.6%)          | 115 (63.2%)                 | 229 (62.9%)     | 192 (73.0%)          | 185 (69.3%)                 | 377 (71.1%)     | 74 (71.2%)           | 74 (70.5%)                  | 148 (70.8%)     |
|                                                        | >25%                        | 68 (37.4%)           | 67 (36.8%)                  | 135 (37.1%)     | 70 (26.6%)           | 81 (30.3%)                  | 151 (28.5%)     | 30 (28.8%)           | 31 (29.5%)                  | 61 (29.2%)      |
|                                                        | Missing                     |                      |                             |                 | 1 (0.4%)             | 1 (0.4%)                    | 2 (0.4%)        |                      |                             |                 |
| Treating region <sup>5</sup>                           | Australia                   |                      |                             |                 | 98 (37.3%)           | 93 (34.8%)                  | 191 (36.0%)     | 42 (40.4%)           | 36 (34.3%)                  | 78 (37.3%)      |
|                                                        | Belgium                     |                      |                             |                 | 7 (2.7%)             | 21 (7.9%)                   | 28 (5.3%)       | 4 (3.8%)             | 5 (4.8%)                    | 9 (4.3%)        |
|                                                        | France                      |                      |                             |                 | 14 (5.3%)            | 14 (5.2%)                   | 28 (5.3%)       | 15 (14.4%)           | 12 (11.4%)                  | 27 (12.9%)      |
|                                                        | Germany                     |                      |                             |                 | 48 (18.3%)           | 33 (12.4%)                  | 81 (15.3%)      | 3 (2.9%)             | 3 (2.9%)                    | 6 (2.9%)        |
|                                                        | Israel                      |                      |                             |                 | 14 (5.3%)            | 22 (8.2%)                   | 36 (6.8%)       | 6 (5.8%)             | 11 (10.5%)                  | 17 (8.1%)       |
|                                                        | Italy                       |                      |                             |                 | 1 (0.4%)             | 1 (0.4%)                    | 2 (0.4%)        | 3 (2.9%)             | 7 (6.7%)                    | 10 (4.8%)       |
|                                                        | Korea, Republic Of          |                      |                             |                 |                      |                             |                 | 2 (1.9%)             | 3 (2.9%)                    | 5 (2.4%)        |
|                                                        | New Zealand                 |                      |                             |                 | 43 (16.3%)           | 45 (16.9%)                  | 88 (16.6%)      | 10 (9.6%)            | 4 (3.8%)                    | 14 (6.7%)       |
|                                                        | Portugal                    |                      |                             |                 |                      |                             |                 | 2 (1.9%)             |                             | 2 (1.0%)        |
|                                                        | Singapore                   |                      |                             |                 |                      |                             |                 | 1 (1.0%)             |                             | 1 (0.5%)        |
|                                                        | Spain                       |                      |                             |                 | 8 (3.0%)             | 9 (3.4%)                    | 17 (3.2%)       | 6 (5.8%)             | 4 (3.8%)                    | 10 (4.8%)       |
|                                                        | Taiwan, Province Of China   |                      |                             |                 |                      |                             |                 | 3 (2.9%)             | 4 (3.8%)                    | 7 (3.3%)        |
|                                                        | United Kingdom              | 182 (100.0%)         | 182 (100.0%)                | 364 (100.0%)    |                      |                             |                 |                      |                             |                 |
|                                                        | United States               |                      |                             |                 | 30 (11.4%)           | 29 (10.9%)                  | 59 (11.1%)      | 7 (6.7%)             | 16 (15.2%)                  | 23 (11.0%)      |
| Intention to treat with biological agents <sup>4</sup> | Yes                         | 65 (35.7%)           | 65 (35.7%)                  | 130 (35.7%)     | 147 (55.9%)          | 146 (54.7%)                 | 293 (55.3%)     | 87 (83.7%)           | 87 (82.9%)                  | 174 (83.3%)     |
|                                                        | No                          | 96 (52.7%)           | 95 (52.2%)                  | 191 (52.5%)     | 40 (15.2%)           | 40 (15.0%)                  | 80 (15.1%)      | 17 (16.3%)           | 18 (17.1%)                  | 35 (16.7%)      |
|                                                        | Not applicable <sup>6</sup> | 21 (11.5%)           | 22 (12.1%)                  | 43 (11.8%)      | 76 (28.9%)           | 81 (30.3%)                  | 157 (29.6%)     |                      |                             |                 |

<sup>1</sup> Mean (standard deviation)

<sup>2</sup> Median (interquartile range)

<sup>3</sup> Patient's site of primary tumour recorded as being both colon and rectum. Note: only options for FOXFIRE were colon or rectum

<sup>4</sup> Minimisation factors

<sup>5</sup> The minimisation factor was centre, not treating region (28, 87 and 69 centres in total in FOXFIRE, SIRFLOX & FOXFIRE-Global, respectively)

<sup>6</sup> Intention to treat with a biological agent was not a minimisation variable for these patients as it was introduced after these patients entered the study

**Table S4: Treatment exposure subsequent to trial-specified treatment (n=1103)**

|                             | FOXFIRE               |                              |                 | SIRFLOX               |                              |                 | FOXFIRE GLOBAL        |                              |                 | COMBINED              |                              |                  | Mantel-Haenszel statistic; P-Value <sup>1</sup> |
|-----------------------------|-----------------------|------------------------------|-----------------|-----------------------|------------------------------|-----------------|-----------------------|------------------------------|-----------------|-----------------------|------------------------------|------------------|-------------------------------------------------|
|                             | Chemot herapy (n=182) | Chemot herapy + SIRT (n=182) | Overall (n=364) | Chemot herapy (n=263) | Chemot herapy + SIRT (n=267) | Overall (n=530) | Chemot herapy (n=104) | Chemot herapy + SIRT (n=105) | Overall (n=209) | Chemot herapy (n=549) | Chemot herapy + SIRT (n=554) | Overall (n=1103) |                                                 |
| <b>Subsequent Chemo</b>     | 136 (74.7%)           | 121 (66.5%)                  | 257 (70.6%)     | 196 (74.5%)           | 197 (73.8%)                  | 393 (74.2%)     | 74 (71.2%)            | 58 (55.2%)                   | 132 (63.2%)     | 406 (74.0%)           | 376 (67.9%)                  | 782 (70.9%)      | <b>4.99; 0.026<sup>2</sup></b>                  |
| Oxaliplatin                 | 46 (25.3%)            | 46 (25.3%)                   | 92 (25.3%)      | 73 (27.8%)            | 70 (26.2%)                   | 143 (27.0%)     | 25 (24.0%)            | 21 (20.0%)                   | 46 (22.0%)      | 144 (26.2%)           | 137 (24.7%)                  | 281 (25.5%)      | 0.08; 0.782                                     |
| Oxaliplatin Continued       | 12 (6.6%)             | 10 (5.5%)                    | 22 (6.0%)       | 26 (9.9%)             | 23 (8.6%)                    | 49 (9.2%)       | 5 (4.8%)              | 8 (7.6%)                     | 13 (6.2%)       | 43 (7.8%)             | 41 (7.4%)                    | 84 (7.6%)        |                                                 |
| Fluorouracil                | 102 (56.0%)           | 85 (46.7%)                   | 187 (51.4%)     | 168 (63.9%)           | 164 (61.4%)                  | 332 (62.6%)     | 67 (64.4%)            | 50 (47.6%)                   | 117 (56.0%)     | 337 (61.4%)           | 299 (54.0%)                  | 636 (57.7%)      | 6.31; 0.012 <sup>2</sup>                        |
| Irinotecan                  | 122 (67.0%)           | 103 (56.6%)                  | 225 (61.8%)     | 181 (68.8%)           | 171 (64.0%)                  | 352 (66.4%)     | 63 (60.6%)            | 42 (40.0%)                   | 105 (50.2%)     | 366 (66.7%)           | 316 (57.0%)                  | 682 (61.8%)      | 10.99; 0.001 <sup>2</sup>                       |
| Anti-EGFR                   | 31 (17.0%)            | 33 (18.1%)                   | 64 (17.6%)      | 79 (30.0%)            | 61 (22.8%)                   | 140 (26.4%)     | 31 (29.8%)            | 14 (13.3%)                   | 45 (21.5%)      | 141 (25.7%)           | 108 (19.5%)                  | 249 (22.6%)      | 6.13; 0.013 <sup>2</sup>                        |
| Anti-VEGF                   | 55 (30.2%)            | 44 (24.2%)                   | 99 (27.2%)      | 90 (34.2%)            | 75 (28.1%)                   | 165 (31.1%)     | 41 (39.4%)            | 30 (28.6%)                   | 71 (34.0%)      | 186 (33.9%)           | 149 (26.9%)                  | 335 (30.4%)      | 6.38; 0.012 <sup>2</sup>                        |
| Regorafenib                 | 1 (0.6%)              |                              | 1 (0.3%)        | 14 (5.3%)             | 22 (8.2%)                    | 36 (6.8%)       | 5 (4.8%)              | 4 (3.8%)                     | 9 (4.3%)        | 20 (3.6%)             | 26 (4.7%)                    | 46 (4.2%)        |                                                 |
| Mitomycin C                 | 7 (3.8%)              | 3 (1.6%)                     | 10 (2.7%)       | 19 (7.2%)             | 11 (4.1%)                    | 30 (5.7%)       | 1 (1.0%)              | 3 (2.9%)                     | 4 (1.9%)        | 27 (4.9%)             | 17 (3.1%)                    | 44 (4.0%)        |                                                 |
| Study – VEGF/placebo        | 3 (1.6%)              | 2 (1.1%)                     | 5 (1.4%)        | 7 (2.7%)              | 3 (1.1%)                     | 10 (1.9%)       | 2 (1.9%)              | 3 (2.9%)                     | 5 (2.4%)        | 12 (2.2%)             | 8 (1.4%)                     | 20 (1.8%)        |                                                 |
| Study – EGFR/placebo        |                       |                              |                 | 3 (1.1%)              | 1 (0.4%)                     | 4 (0.8%)        | 1 (1.0%)              |                              | 1 (0.5%)        | 4 (0.7%)              | 1 (0.2%)                     | 5 (0.5%)         |                                                 |
| Study – Other               | 3 (1.6%)              | 4 (2.2%)                     | 7 (1.9%)        | 8 (3.0%)              | 6 (2.2%)                     | 14 (2.6%)       | 1 (1.0%)              |                              | 1 (0.5%)        | 12 (2.2%)             | 10 (1.8%)                    | 22 (2.0%)        |                                                 |
| Other Chemo                 | 5 (2.7%)              | 2 (1.1%)                     | 7 (1.9%)        | 6 (2.3%)              | 10 (3.7%)                    | 16 (3.0%)       | 3 (2.9%)              | 4 (3.8%)                     | 7 (3.3%)        | 14 (2.6%)             | 16 (2.9%)                    | 30 (2.7%)        |                                                 |
| <b>Subsequent Non-Chemo</b> | 77 (42.3%)            | 71 (39.0%)                   | 148 (40.7%)     | 123 (46.8%)           | 110 (41.2%)                  | 233 (44.0%)     | 26 (25.0%)            | 29 (27.6%)                   | 55 (26.3%)      | 226 (41.2%)           | 210 (37.9%)                  | 436 (39.5%)      | <b>1.25; 0.263</b>                              |
| Surgery – Liver             | 13 (7.1%)             | 25 (13.7%)                   | 38 (10.4%)      | 10 (3.8%)             | 6 (2.2%)                     | 16 (3.0%)       | 4 (3.8%)              |                              | 4 (1.9%)        | 27 (4.9%)             | 31 (5.6%)                    | 58 (5.3%)        |                                                 |
| Surgery – Non Liver         | 21 (11.5%)            | 27 (14.8%)                   | 48 (13.2%)      | 5 (1.9%)              | 7 (2.6%)                     | 12 (2.3%)       | 1 (1.0%)              | 2 (1.9%)                     | 3 (1.4%)        | 27 (4.9%)             | 36 (6.5%)                    | 63 (5.7%)        |                                                 |
| Ablation – Liver            | 4 (2.2%)              | 1 (0.5%)                     | 5 (1.4%)        | 4 (1.5%)              | 5 (1.9%)                     | 9 (1.7%)        | 1 (1.0%)              |                              | 1 (0.5%)        | 9 (1.6%)              | 6 (1.1%)                     | 15 (1.4%)        |                                                 |
| Ablation – Non Liver        | 7 (3.8%)              | 12 (6.6%)                    | 19 (5.2%)       | 2 (0.8%)              | 3 (1.1%)                     | 5 (0.9%)        |                       | 1 (1.0%)                     | 1 (0.5%)        | 9 (1.6%)              | 16 (2.9%)                    | 25 (2.3%)        |                                                 |
| Radiotherapy – SIRT         | 20 (11.0%)            | 1 (0.5%)                     | 21 (5.8%)       | 38 (14.4%)            | 11 (4.1%)                    | 49 (9.2%)       | 8 (7.7%)              | 4 (3.8%)                     | 12 (5.7%)       | 66 (12.0%)            | 16 (2.9%)                    | 82 (7.4%)        |                                                 |
| Radiotherapy – Non SIRT     | 29 (15.9%)            | 24 (13.2%)                   | 53 (14.6%)      | 28 (10.6%)            | 35 (13.1%)                   | 63 (11.9%)      | 6 (5.8%)              | 6 (5.7%)                     | 12 (5.7%)       | 63 (11.5%)            | 65 (11.7%)                   | 128 (11.6%)      |                                                 |
| Chemoembolisation           |                       |                              |                 | 5 (1.9%)              | 4 (1.5%)                     | 9 (1.7%)        | 1 (1.0%)              | 2 (1.9%)                     | 3 (1.4%)        | 6 (1.1%)              | 6 (1.1%)                     | 12 (1.1%)        |                                                 |
| Non Chemo – Other           | 13 (7.1%)             | 11 (6.0%)                    | 24 (6.6%)       | 16 (6.1%)             | 12 (4.5%)                    | 28 (5.3%)       | 4 (3.8%)              | 1 (1.0%)                     | 5 (2.4%)        | 33 (6.0%)             | 24 (4.3%)                    | 57 (5.2%)        |                                                 |

<sup>1</sup> Results from Mantel-Haenszel tests

<sup>2</sup> Statistically significantly different between treatment groups: p < 0.05

<sup>3</sup> Oxaliplatin is treated as “continued” if the patient received it within the first three months of ending trial protocol-specified treatment and had no other treatments in between



**Table S5: Cause-specific and sub-distribution hazard ratios for liver-specific progression-free survival (n=1103)**

| Liver-Specific Progression-Free Survival |                     | HR (95% CI)                     |                                                            |
|------------------------------------------|---------------------|---------------------------------|------------------------------------------------------------|
|                                          |                     | Liver progression (n=444)       | Non-liver progression or death without progression (n=497) |
| Treatment                                | Sub-distribution HR | 0.51 (0.43 – 0.62)              | 1.76 (1.47 – 2.11)                                         |
|                                          | Cause-specific HR   | 0.57 (0.47 – 0.69) <sup>1</sup> | 1.36 (1.13 – 1.62) <sup>1</sup>                            |

<sup>1</sup> Time-constant estimates are provided: although there was a statistically significant departure from the proportional hazards assumption in both Cox models (p=0.018 and p=0.027 for liver and non-liver progression respectively), the residual plots did not indicate a major deviation from the proportional hazards assumption

**Table S6: Best response (n=1103)**

|                    |                              | Chemotherapy (n=549) | Chemotherapy + SIRT (n=554) | Overall (n=1103) |
|--------------------|------------------------------|----------------------|-----------------------------|------------------|
| Objective response | Objective response (CR + PR) | 345 (62.8%)          | 401 (72.4%)                 | 746 (67.6%)      |
|                    | Complete response (CR)       | 9 (1.6%)             | 25 (4.5%)                   | 34 (3.1%)        |
|                    | Partial response (PR)        | 336 (61.2%)          | 376 (67.9%)                 | 712 (64.6%)      |
|                    | Stable disease (SD)          | 142 (25.9%)          | 90 (16.3%)                  | 232 (21.0%)      |
|                    | Progressive Disease (PD)     | 23 (4.2%)            | 27 (4.9%)                   | 50 (4.5%)        |
|                    | Early death                  | 14 (2.6%)            | 16 (2.9%)                   | 30 (2.7%)        |
|                    | Unknown                      | 25 (4.6%)            | 20 (3.6%)                   | 45 (4.1%)        |

**Table S7: Best response achieved over the entire study period by individual trial**

|                              |                          | FOXFIRE                     |                                       |                    | SIRFLOX                     |                                       |                    | FOXFIRE GLOBAL              |                                       |                    |
|------------------------------|--------------------------|-----------------------------|---------------------------------------|--------------------|-----------------------------|---------------------------------------|--------------------|-----------------------------|---------------------------------------|--------------------|
|                              |                          | Chemot<br>herapy<br>(n=182) | Chemot<br>herapy<br>+ SIRT<br>(n=182) | Overall<br>(n=364) | Chemot<br>herapy<br>(n=263) | Chemot<br>herapy<br>+ SIRT<br>(n=267) | Overall<br>(n=530) | Chemot<br>herapy<br>(n=104) | Chemot<br>herapy<br>+ SIRT<br>(n=105) | Overall<br>(n=209) |
| Objective response (CR + PR) |                          | 111<br>(61.0%)              | 123<br>(67.6%)                        | 234<br>(64.3%)     | 165<br>(62.7%)              | 205<br>(76.8%)                        | 370<br>(69.8%)     | 69<br>(66.3%)               | 73<br>(69.5%)                         | 142<br>(67.9%)     |
| RECIST<br>response           | Complete response (CR)   | 4<br>(2.2%)                 | 5<br>(2.7%)                           | 9<br>(2.5%)        | 3<br>(1.1%)                 | 15<br>(5.6%)                          | 18<br>(3.4%)       | 2<br>(1.9%)                 | 5<br>(4.8%)                           | 7<br>(3.3%)        |
|                              | Partial response (PR)    | 107<br>(58.8%)              | 118<br>(64.8%)                        | 225<br>(61.8%)     | 162<br>(61.6%)              | 190<br>(71.2%)                        | 352<br>(66.4%)     | 67<br>(64.4%)               | 68<br>(64.8%)                         | 135<br>(64.6%)     |
|                              | Stable disease (SD)      | 46<br>(25.3%)               | 27<br>(14.8%)                         | 73<br>(20.1%)      | 71<br>(27.0%)               | 42<br>(15.7%)                         | 113<br>(21.3%)     | 25<br>(24.0%)               | 21<br>(20.0%)                         | 46<br>(22.0%)      |
|                              | Progressive Disease (PD) | 11<br>(6.0%)                | 11<br>(6.0%)                          | 22<br>(6.0%)       | 7<br>(2.7%)                 | 9<br>(3.4%)                           | 16<br>(3.0%)       | 5<br>(4.8%)                 | 7<br>(6.7%)                           | 12<br>(5.7%)       |
|                              | Early death              | 7<br>(3.8%)                 | 9<br>(4.9%)                           | 16<br>(4.4%)       | 3<br>(1.1%)                 | 5<br>(1.9%)                           | 8<br>(1.5%)        | 4<br>(3.8%)                 | 2<br>(1.9%)                           | 6<br>(2.9%)        |
|                              | Unknown                  | 7<br>(3.8%)                 | 12<br>(6.6%)                          | 19<br>(5.2%)       | 17<br>(6.5%)                | 6<br>(2.2%)                           | 23<br>(4.3%)       | 1<br>(1.0%)                 | 2<br>(1.9%)                           | 3<br>(1.4%)        |

**Table S8: Best liver-specific response achieved over the entire study period**

|                              | FOXFIRE                     |                                       |                    | SIRFLOX                     |                                       |                    | FOXFIRE GLOBAL              |                                       |                    |                |
|------------------------------|-----------------------------|---------------------------------------|--------------------|-----------------------------|---------------------------------------|--------------------|-----------------------------|---------------------------------------|--------------------|----------------|
|                              | Chemot<br>herapy<br>(n=182) | Chemot<br>herapy<br>+ SIRT<br>(n=182) | Overall<br>(n=364) | Chemot<br>herapy<br>(n=263) | Chemot<br>herapy<br>+ SIRT<br>(n=267) | Overall<br>(n=530) | Chemot<br>herapy<br>(n=104) | Chemot<br>herapy<br>+ SIRT<br>(n=105) | Overall<br>(n=209) |                |
| Objective response (CR + PR) | 112<br>(61.5%)              | 128<br>(70.3%)                        | 240<br>(65.9%)     | 167<br>(63.5%)              | 214<br>(80.2%)                        | 381<br>(71.9%)     | 71<br>(68.3%)               | 78<br>(74.3%)                         | 149<br>(71.3%)     |                |
| RECIST<br>response           | Complete response<br>(CR)   | 5<br>(2.8%)                           | 5<br>(2.8%)        | 10<br>(2.8%)                | 3<br>(1.1%)                           | 20<br>(7.5%)       | 23<br>(4.3%)                | 3<br>(2.9%)                           | 8<br>(7.6%)        | 11<br>(5.3%)   |
|                              | Partial response<br>(PR)    | 107<br>(58.8%)                        | 123<br>(67.6%)     | 230<br>(63.2%)              | 164<br>(62.4%)                        | 194<br>(72.7%)     | 358<br>(67.6%)              | 68<br>(65.4%)                         | 70<br>(66.7%)      | 138<br>(66.0%) |
|                              | Stable disease (SD)         | 45<br>(24.7%)                         | 30<br>(16.5%)      | 75<br>(20.6%)               | 69<br>(26.2%)                         | 36<br>(13.5%)      | 105<br>(19.8%)              | 24<br>(23.1%)                         | 19<br>(18.1%)      | 43<br>(20.6%)  |
|                              | Progressive<br>Disease (PD) | 11<br>(6.0%)                          | 3<br>(1.6%)        | 14<br>(3.9%)                | 7<br>(2.7%)                           | 6<br>(2.3%)        | 13<br>(2.5%)                | 4<br>(3.9%)                           | 4<br>(3.8%)        | 8<br>(3.8%)    |
|                              | Early death                 | 7<br>(3.8%)                           | 9<br>(4.9%)        | 16<br>(4.4%)                | 3<br>(1.1%)                           | 5<br>(1.9%)        | 8<br>(1.5%)                 | 4<br>(3.9%)                           | 2<br>(1.9%)        | 6<br>(2.9%)    |
|                              | Unknown                     | 7<br>(3.8%)                           | 12<br>(6.6%)       | 19<br>(5.2%)                | 17<br>(6.5%)                          | 6<br>(2.3%)        | 23<br>(4.3%)                | 1<br>(1.0%)                           | 2<br>(1.9%)        | 3<br>(1.4%)    |

**Table S9: Worst reported adverse events (not cumulative) sorted by prevalence of patients with adverse events<sup>1</sup>**

| Event Term                       | Chemo alone    |            |           |          | Chemo + SIRT   |                |            |        |
|----------------------------------|----------------|------------|-----------|----------|----------------|----------------|------------|--------|
|                                  | 1 and 2        | 3          | 4         | 5        | 1 and 2        | 3              | 4          | 5      |
| Neuropathy peripheral            | 307<br>(53.8%) | 32 (5.6%)  | 1 (0.2%)  | 0 (0%)   | 273<br>(53.8%) | 18 (3.6%)      | 0 (0%)     | 0 (0%) |
| Fatigue                          | 275<br>(48.2%) | 28 (4.9%)  | 0 (0%)    | 0 (0%)   | 261<br>(51.5%) | 43 (8.5%)      | 0 (0%)     | 0 (0%) |
| Nausea                           | 269<br>(47.1%) | 6 (1.1%)   | 0 (0%)    | 0 (0%)   | 282<br>(55.6%) | 13 (2.6%)      | 0 (0%)     | 0 (0%) |
| Diarrhoea                        | 256<br>(44.8%) | 35 (6.1%)  | 2 (0.4%)  | 0 (0%)   | 189<br>(37.3%) | 33 (6.5%)      | 1 (0.2%)   | 0 (0%) |
| Neutropenia                      | 50 (8.8%)      | 89 (15.6%) | 48 (8.4%) | 1 (0.2%) | 55 (10.8%)     | 115<br>(22.7%) | 71 (14.0%) | 0 (0%) |
| Constipation                     | 201<br>(35.2%) | 5 (0.9%)   | 3 (0.5%)  | 0 (0%)   | 203<br>(40.0%) | 8 (1.6%)       | 1 (0.2%)   | 0 (0%) |
| Decreased appetite               | 149<br>(26.1%) | 5 (0.9%)   | 0 (0%)    | 0 (0%)   | 159<br>(31.4%) | 8 (1.6%)       | 0 (0%)     | 0 (0%) |
| Vomiting                         | 128<br>(22.4%) | 8 (1.4%)   | 1 (0.2%)  | 0 (0%)   | 152<br>(30.0%) | 20 (3.9%)      | 0 (0%)     | 0 (0%) |
| Abdominal pain                   | 95 (16.6%)     | 13 (2.3%)  | 0 (0%)    | 0 (0%)   | 151<br>(29.8%) | 30 (5.9%)      | 1 (0.2%)   | 0 (0%) |
| Thrombocytopenia                 | 77 (13.5%)     | 6 (1.1%)   | 1 (0.2%)  | 0 (0%)   | 153<br>(30.2%) | 37 (7.3%)      | 2 (0.4%)   | 0 (0%) |
| Mucosal inflammation             | 136<br>(23.8%) | 9 (1.6%)   | 0 (0%)    | 0 (0%)   | 101<br>(19.9%) | 6 (1.2%)       | 0 (0%)     | 0 (0%) |
| Dysgeusia                        | 115<br>(20.1%) | 1 (0.2%)   | 0 (0%)    | 0 (0%)   | 115<br>(22.7%) | 0 (0%)         | 0 (0%)     | 0 (0%) |
| Epistaxis                        | 122<br>(21.4%) | 0 (0%)     | 0 (0%)    | 0 (0%)   | 102<br>(20.1%) | 1 (0.2%)       | 0 (0%)     | 0 (0%) |
| Peripheral sensory<br>neuropathy | 110<br>(19.3%) | 8 (1.4%)   | 0 (0%)    | 0 (0%)   | 89 (17.6%)     | 2 (0.4%)       | 0 (0%)     | 0 (0%) |
| Stomatitis                       | 103<br>(18.0%) | 6 (1.1%)   | 0 (0%)    | 0 (0%)   | 88 (17.4%)     | 6 (1.2%)       | 0 (0%)     | 0 (0%) |
| Alopecia                         | 89 (15.6%)     | 1 (0.2%)   | 0 (0%)    | 0 (0%)   | 75 (14.8%)     | 0 (0%)         | 0 (0%)     | 0 (0%) |
| Pyrexia                          | 70 (12.3%)     | 6 (1.1%)   | 0 (0%)    | 0 (0%)   | 73 (14.4%)     | 12 (2.4%)      | 1 (0.2%)   | 0 (0%) |
| Paraesthesia                     | 77 (13.5%)     | 5 (0.9%)   | 0 (0%)    | 0 (0%)   | 58 (11.4%)     | 4 (0.8%)       | 0 (0%)     | 0 (0%) |

| Event Term                                 | Chemo alone |           |           |        | Chemo + SIRT |           |           |          |
|--------------------------------------------|-------------|-----------|-----------|--------|--------------|-----------|-----------|----------|
|                                            | 1 and 2     | 3         | 4         | 5      | 1 and 2      | 3         | 4         | 5        |
| Anaemia                                    | 57 (10.0%)  | 9 (1.6%)  | 3 (0.5%)  | 0 (0%) | 56 (11.0%)   | 13 (2.6%) | 0 (0%)    | 0 (0%)   |
| Lethargy                                   | 66 (11.6%)  | 8 (1.4%)  | 0 (0%)    | 0 (0%) | 52 (10.3%)   | 5 (1.0%)  | 0 (0%)    | 0 (0%)   |
| Abdominal pain upper                       | 28 (4.9%)   | 2 (0.4%)  | 1 (0.2%)  | 0 (0%) | 90 (17.8%)   | 8 (1.6%)  | 0 (0%)    | 0 (0%)   |
| Hypertension                               | 60 (10.5%)  | 15 (2.6%) | 0 (0%)    | 0 (0%) | 43 (8.5%)    | 11 (2.2%) | 0 (0%)    | 0 (0%)   |
| Weight decreased                           | 51 (8.9%)   | 0 (0%)    | 0 (0%)    | 0 (0%) | 69 (13.6%)   | 9 (1.8%)  | 0 (0%)    | 0 (0%)   |
| Rash                                       | 67 (11.7%)  | 1 (0.2%)  | 0 (0%)    | 0 (0%) | 56 (11.0%)   | 0 (0%)    | 0 (0%)    | 0 (0%)   |
| Insomnia                                   | 58 (10.2%)  | 0 (0%)    | 0 (0%)    | 0 (0%) | 58 (11.4%)   | 1 (0.2%)  | 0 (0%)    | 0 (0%)   |
| Palmar-plantar erythrodysesthesia syndrome | 69 (12.1%)  | 6 (1.1%)  | 0 (0%)    | 0 (0%) | 36 (7.1%)    | 3 (0.6%)  | 0 (0%)    | 0 (0%)   |
| Leukopenia                                 | 28 (4.9%)   | 10 (1.8%) | 3 (0.5%)  | 0 (0%) | 41 (8.1%)    | 20 (3.9%) | 10 (2.0%) | 0 (0%)   |
| Pain                                       | 34 (6.0%)   | 5 (0.9%)  | 0 (0%)    | 0 (0%) | 50 (9.9%)    | 17 (3.4%) | 0 (0%)    | 0 (0%)   |
| Headache                                   | 53 (9.3%)   | 2 (0.4%)  | 0 (0%)    | 0 (0%) | 44 (8.7%)    | 3 (0.6%)  | 0 (0%)    | 0 (0%)   |
| Cough                                      | 51 (8.9%)   | 1 (0.2%)  | 0 (0%)    | 0 (0%) | 46 (9.1%)    | 0 (0%)    | 0 (0%)    | 0 (0%)   |
| Asthenia                                   | 40 (7.0%)   | 5 (0.9%)  | 0 (0%)    | 0 (0%) | 47 (9.3%)    | 3 (0.6%)  | 0 (0%)    | 0 (0%)   |
| Dyspnoea                                   | 46 (8.1%)   | 2 (0.4%)  | 3 (0.5%)  | 0 (0%) | 40 (7.9%)    | 2 (0.4%)  | 1 (0.2%)  | 1 (0.2%) |
| Back pain                                  | 33 (5.8%)   | 4 (0.7%)  | 1 (0.2%)  | 0 (0%) | 48 (9.5%)    | 1 (0.2%)  | 0 (0%)    | 0 (0%)   |
| Dizziness                                  | 47 (8.2%)   | 1 (0.2%)  | 0 (0%)    | 0 (0%) | 35 (6.9%)    | 0 (0%)    | 0 (0%)    | 0 (0%)   |
| Hypokalaemia                               | 19 (3.3%)   | 7 (1.2%)  | 2 (0.4%)  | 0 (0%) | 26 (5.1%)    | 12 (2.4%) | 1 (0.2%)  | 0 (0%)   |
| Gastroesophageal reflux disease            | 42 (7.4%)   | 0 (0%)    | 0 (0%)    | 0 (0%) | 23 (4.5%)    | 1 (0.2%)  | 0 (0%)    | 0 (0%)   |
| Mouth ulceration                           | 42 (7.4%)   | 2 (0.4%)  | 0 (0%)    | 0 (0%) | 21 (4.1%)    | 0 (0%)    | 0 (0%)    | 0 (0%)   |
| Oedema peripheral                          | 18 (3.2%)   | 1 (0.2%)  | 0 (0%)    | 0 (0%) | 43 (8.5%)    | 2 (0.4%)  | 0 (0%)    | 0 (0%)   |
| Urinary tract infection                    | 26 (4.6%)   | 3 (0.5%)  | 0 (0%)    | 0 (0%) | 28 (5.5%)    | 2 (0.4%)  | 0 (0%)    | 0 (0%)   |
| Chest pain                                 | 19 (3.3%)   | 3 (0.5%)  | 0 (0%)    | 0 (0%) | 27 (5.3%)    | 9 (1.8%)  | 0 (0%)    | 0 (0%)   |
| Pulmonary embolism                         | 1 (0.2%)    | 7 (1.2%)  | 19 (3.3%) | 0 (0%) | 2 (0.4%)     | 4 (0.8%)  | 24 (4.7%) | 0 (0%)   |
| Rectal haemorrhage                         | 27 (4.7%)   | 2 (0.4%)  | 0 (0%)    | 0 (0%) | 23 (4.5%)    | 2 (0.4%)  | 0 (0%)    | 0 (0%)   |
| Upper respiratory tract infection          | 28 (4.9%)   | 1 (0.2%)  | 0 (0%)    | 0 (0%) | 21 (4.1%)    | 1 (0.2%)  | 0 (0%)    | 0 (0%)   |
| Hiccups                                    | 22 (3.9%)   | 0 (0%)    | 0 (0%)    | 0 (0%) | 26 (5.1%)    | 2 (0.4%)  | 0 (0%)    | 0 (0%)   |
| Febrile neutropenia                        | 0 (0%)      | 11 (1.9%) | 5 (0.9%)  | 0 (0%) | 0 (0%)       | 25 (4.9%) | 7 (1.4%)  | 1 (0.2%) |
| Musculoskeletal pain                       | 25 (4.4%)   | 1 (0.2%)  | 0 (0%)    | 0 (0%) | 20 (3.9%)    | 2 (0.4%)  | 0 (0%)    | 0 (0%)   |
| Dehydration                                | 13 (2.3%)   | 5 (0.9%)  | 1 (0.2%)  | 0 (0%) | 15 (3.0%)    | 10 (2.0%) | 1 (0.2%)  | 0 (0%)   |
| Abdominal distension                       | 19 (3.3%)   | 0 (0%)    | 0 (0%)    | 0 (0%) | 23 (4.5%)    | 2 (0.4%)  | 0 (0%)    | 0 (0%)   |
| Pain in extremity                          | 17 (3.0%)   | 4 (0.7%)  | 0 (0%)    | 0 (0%) | 22 (4.3%)    | 0 (0%)    | 0 (0%)    | 0 (0%)   |
| Procedural pain                            | 6 (1.1%)    | 0 (0%)    | 0 (0%)    | 0 (0%) | 31 (6.1%)    | 5 (1.0%)  | 0 (0%)    | 0 (0%)   |
| Hyperglycaemia                             | 7 (1.2%)    | 10 (1.8%) | 5 (0.9%)  | 0 (0%) | 12 (2.4%)    | 6 (1.2%)  | 1 (0.2%)  | 0 (0%)   |
| Blood alkaline phosphatase increased       | 12 (2.1%)   | 1 (0.2%)  | 0 (0%)    | 0 (0%) | 22 (4.3%)    | 2 (0.4%)  | 0 (0%)    | 0 (0%)   |
| Hypotension                                | 11 (1.9%)   | 4 (0.7%)  | 2 (0.4%)  | 0 (0%) | 15 (3.0%)    | 4 (0.8%)  | 0 (0%)    | 0 (0%)   |
| Ascites                                    | 2 (0.4%)    | 4 (0.7%)  | 0 (0%)    | 0 (0%) | 23 (4.5%)    | 6 (1.2%)  | 0 (0%)    | 0 (0%)   |
| Infection                                  | 5 (0.9%)    | 14 (2.5%) | 0 (0%)    | 0 (0%) | 11 (2.2%)    | 5 (1.0%)  | 0 (0%)    | 0 (0%)   |
| Neurotoxicity                              | 19 (3.3%)   | 1 (0.2%)  | 0 (0%)    | 0 (0%) | 15 (3.0%)    | 0 (0%)    | 0 (0%)    | 0 (0%)   |
| Lower respiratory tract infection          | 10 (1.8%)   | 5 (0.9%)  | 0 (0%)    | 0 (0%) | 16 (3.2%)    | 3 (0.6%)  | 0 (0%)    | 0 (0%)   |
| Lymphopenia                                | 5 (0.9%)    | 1 (0.2%)  | 0 (0%)    | 0 (0%) | 8 (1.6%)     | 16 (3.2%) | 3 (0.6%)  | 0 (0%)   |
| Pruritus                                   | 19 (3.3%)   | 0 (0%)    | 0 (0%)    | 0 (0%) | 13 (2.6%)    | 1 (0.2%)  | 0 (0%)    | 0 (0%)   |
| Aspartate aminotransferase increased       | 8 (1.4%)    | 2 (0.4%)  | 0 (0%)    | 0 (0%) | 18 (3.6%)    | 4 (0.8%)  | 0 (0%)    | 0 (0%)   |
| Polyneuropathy                             | 17 (3.0%)   | 1 (0.2%)  | 0 (0%)    | 0 (0%) | 11 (2.2%)    | 2 (0.4%)  | 0 (0%)    | 0 (0%)   |
| Deep vein thrombosis                       | 3 (0.5%)    | 7 (1.2%)  | 0 (0%)    | 0 (0%) | 6 (1.2%)     | 10 (2.0%) | 2 (0.4%)  | 0 (0%)   |
| Hypomagnesaemia                            | 19 (3.3%)   | 0 (0%)    | 0 (0%)    | 0 (0%) | 7 (1.4%)     | 1 (0.2%)  | 0 (0%)    | 0 (0%)   |
| Depression                                 | 8 (1.4%)    | 2 (0.4%)  | 0 (0%)    | 0 (0%) | 15 (3.0%)    | 1 (0.2%)  | 0 (0%)    | 0 (0%)   |

| Event Term                                       | Chemo alone |           |          |          | Chemo + SIRT |          |          |          |
|--------------------------------------------------|-------------|-----------|----------|----------|--------------|----------|----------|----------|
|                                                  | 1 and 2     | 3         | 4        | 5        | 1 and 2      | 3        | 4        | 5        |
| Hypoalbuminaemia                                 | 5 (0.9%)    | 1 (0.2%)  | 0 (0%)   | 0 (0%)   | 14 (2.8%)    | 3 (0.6%) | 0 (0%)   | 0 (0%)   |
| Tremor                                           | 12 (2.1%)   | 1 (0.2%)  | 0 (0%)   | 0 (0%)   | 10 (2.0%)    | 0 (0%)   | 0 (0%)   | 0 (0%)   |
| Alanine aminotransferase increased               | 4 (0.7%)    | 2 (0.4%)  | 0 (0%)   | 0 (0%)   | 14 (2.8%)    | 2 (0.4%) | 0 (0%)   | 0 (0%)   |
| Oral pain                                        | 12 (2.1%)   | 1 (0.2%)  | 0 (0%)   | 0 (0%)   | 9 (1.8%)     | 0 (0%)   | 0 (0%)   | 0 (0%)   |
| Proctalgia                                       | 10 (1.8%)   | 0 (0%)    | 0 (0%)   | 0 (0%)   | 11 (2.2%)    | 1 (0.2%) | 0 (0%)   | 0 (0%)   |
| Chills                                           | 8 (1.4%)    | 0 (0%)    | 0 (0%)   | 0 (0%)   | 12 (2.4%)    | 1 (0.2%) | 0 (0%)   | 0 (0%)   |
| Confusional state                                | 6 (1.1%)    | 5 (0.9%)  | 0 (0%)   | 0 (0%)   | 8 (1.6%)     | 2 (0.4%) | 0 (0%)   | 0 (0%)   |
| Intestinal obstruction                           | 0 (0%)      | 10 (1.8%) | 2 (0.4%) | 0 (0%)   | 3 (0.6%)     | 5 (1.0%) | 1 (0.2%) | 0 (0%)   |
| Neutropenic sepsis                               | 2 (0.4%)    | 1 (0.2%)  | 4 (0.7%) | 1 (0.2%) | 0 (0%)       | 5 (1.0%) | 7 (1.4%) | 0 (0%)   |
| Device related infection                         | 8 (1.4%)    | 3 (0.5%)  | 0 (0%)   | 0 (0%)   | 3 (0.6%)     | 5 (1.0%) | 0 (0%)   | 0 (0%)   |
| Muscular weakness                                | 9 (1.6%)    | 1 (0.2%)  | 0 (0%)   | 0 (0%)   | 8 (1.6%)     | 0 (0%)   | 0 (0%)   | 0 (0%)   |
| Drug hypersensitivity                            | 4 (0.7%)    | 1 (0.2%)  | 1 (0.2%) | 0 (0%)   | 7 (1.4%)     | 4 (0.8%) | 0 (0%)   | 0 (0%)   |
| Hepatic pain                                     | 3 (0.5%)    | 1 (0.2%)  | 0 (0%)   | 0 (0%)   | 12 (2.4%)    | 1 (0.2%) | 0 (0%)   | 0 (0%)   |
| Hyponatraemia                                    | 5 (0.9%)    | 1 (0.2%)  | 0 (0%)   | 0 (0%)   | 4 (0.8%)     | 6 (1.2%) | 1 (0.2%) | 0 (0%)   |
| Productive cough                                 | 9 (1.6%)    | 0 (0%)    | 0 (0%)   | 0 (0%)   | 7 (1.4%)     | 1 (0.2%) | 0 (0%)   | 0 (0%)   |
| Tachycardia                                      | 4 (0.7%)    | 2 (0.4%)  | 0 (0%)   | 0 (0%)   | 11 (2.2%)    | 0 (0%)   | 0 (0%)   | 0 (0%)   |
| Syncope                                          | 0 (0%)      | 8 (1.4%)  | 1 (0.2%) | 0 (0%)   | 1 (0.2%)     | 6 (1.2%) | 0 (0%)   | 0 (0%)   |
| Pneumonia                                        | 2 (0.4%)    | 3 (0.5%)  | 1 (0.2%) | 0 (0%)   | 2 (0.4%)     | 6 (1.2%) | 0 (0%)   | 1 (0.2%) |
| Thrombosis                                       | 4 (0.7%)    | 4 (0.7%)  | 0 (0%)   | 0 (0%)   | 3 (0.6%)     | 3 (0.6%) | 1 (0.2%) | 0 (0%)   |
| Blood bilirubin increased                        | 3 (0.5%)    | 2 (0.4%)  | 0 (0%)   | 0 (0%)   | 6 (1.2%)     | 3 (0.6%) | 0 (0%)   | 0 (0%)   |
| Fall                                             | 7 (1.2%)    | 0 (0%)    | 0 (0%)   | 0 (0%)   | 5 (1.0%)     | 2 (0.4%) | 0 (0%)   | 0 (0%)   |
| Hypersensitivity                                 | 9 (1.6%)    | 1 (0.2%)  | 0 (0%)   | 0 (0%)   | 1 (0.2%)     | 2 (0.4%) | 0 (0%)   | 0 (0%)   |
| Hypocalcaemia                                    | 4 (0.7%)    | 1 (0.2%)  | 0 (0%)   | 0 (0%)   | 8 (1.6%)     | 0 (0%)   | 0 (0%)   | 0 (0%)   |
| Hypophosphataemia                                | 1 (0.2%)    | 3 (0.5%)  | 0 (0%)   | 0 (0%)   | 6 (1.2%)     | 2 (0.4%) | 1 (0.2%) | 0 (0%)   |
| Peripheral motor neuropathy                      | 5 (0.9%)    | 1 (0.2%)  | 0 (0%)   | 0 (0%)   | 7 (1.4%)     | 0 (0%)   | 0 (0%)   | 0 (0%)   |
| Blood albumin decreased                          | 2 (0.4%)    | 0 (0%)    | 0 (0%)   | 0 (0%)   | 8 (1.6%)     | 1 (0.2%) | 1 (0.2%) | 0 (0%)   |
| Blood potassium decreased                        | 2 (0.4%)    | 2 (0.4%)  | 0 (0%)   | 0 (0%)   | 4 (0.8%)     | 4 (0.8%) | 0 (0%)   | 0 (0%)   |
| Dysphagia                                        | 6 (1.1%)    | 1 (0.2%)  | 0 (0%)   | 0 (0%)   | 5 (1.0%)     | 0 (0%)   | 0 (0%)   | 0 (0%)   |
| Gastric ulcer                                    | 0 (0%)      | 0 (0%)    | 0 (0%)   | 0 (0%)   | 8 (1.6%)     | 3 (0.6%) | 1 (0.2%) | 0 (0%)   |
| Neutrophil count                                 | 3 (0.5%)    | 2 (0.4%)  | 0 (0%)   | 0 (0%)   | 2 (0.4%)     | 3 (0.6%) | 2 (0.4%) | 0 (0%)   |
| Blood creatinine increased                       | 5 (0.9%)    | 1 (0.2%)  | 0 (0%)   | 0 (0%)   | 4 (0.8%)     | 1 (0.2%) | 0 (0%)   | 0 (0%)   |
| Dysaesthesia pharynx                             | 5 (0.9%)    | 1 (0.2%)  | 0 (0%)   | 0 (0%)   | 5 (1.0%)     | 0 (0%)   | 0 (0%)   | 0 (0%)   |
| Gout                                             | 5 (0.9%)    | 0 (0%)    | 0 (0%)   | 0 (0%)   | 5 (1.0%)     | 1 (0.2%) | 0 (0%)   | 0 (0%)   |
| Influenza                                        | 5 (0.9%)    | 1 (0.2%)  | 0 (0%)   | 0 (0%)   | 5 (1.0%)     | 0 (0%)   | 0 (0%)   | 0 (0%)   |
| Intestinal perforation                           | 0 (0%)      | 6 (1.1%)  | 2 (0.4%) | 0 (0%)   | 0 (0%)       | 1 (0.2%) | 1 (0.2%) | 1 (0.2%) |
| Sepsis                                           | 1 (0.2%)    | 5 (0.9%)  | 2 (0.4%) | 0 (0%)   | 0 (0%)       | 2 (0.4%) | 1 (0.2%) | 0 (0%)   |
| Gastroenteritis                                  | 2 (0.4%)    | 0 (0%)    | 0 (0%)   | 0 (0%)   | 4 (0.8%)     | 4 (0.8%) | 0 (0%)   | 0 (0%)   |
| Infusion site infection                          | 3 (0.5%)    | 2 (0.4%)  | 1 (0.2%) | 0 (0%)   | 3 (0.6%)     | 1 (0.2%) | 0 (0%)   | 0 (0%)   |
| Orthostatic hypotension                          | 5 (0.9%)    | 2 (0.4%)  | 0 (0%)   | 0 (0%)   | 3 (0.6%)     | 0 (0%)   | 0 (0%)   | 0 (0%)   |
| Renal failure acute                              | 3 (0.5%)    | 4 (0.7%)  | 0 (0%)   | 0 (0%)   | 1 (0.2%)     | 2 (0.4%) | 0 (0%)   | 0 (0%)   |
| C-reactive protein increased                     | 4 (0.7%)    | 0 (0%)    | 0 (0%)   | 0 (0%)   | 3 (0.6%)     | 2 (0.4%) | 0 (0%)   | 0 (0%)   |
| Documented hypersensitivity to administered drug | 4 (0.7%)    | 2 (0.4%)  | 0 (0%)   | 0 (0%)   | 2 (0.4%)     | 1 (0.2%) | 0 (0%)   | 0 (0%)   |
| Herpes zoster                                    | 6 (1.1%)    | 1 (0.2%)  | 0 (0%)   | 0 (0%)   | 2 (0.4%)     | 0 (0%)   | 0 (0%)   | 0 (0%)   |
| Tooth abscess                                    | 4 (0.7%)    | 1 (0.2%)  | 0 (0%)   | 0 (0%)   | 4 (0.8%)     | 0 (0%)   | 0 (0%)   | 0 (0%)   |
| Balance disorder                                 | 5 (0.9%)    | 0 (0%)    | 0 (0%)   | 0 (0%)   | 2 (0.4%)     | 1 (0.2%) | 0 (0%)   | 0 (0%)   |
| Duodenal ulcer                                   | 1 (0.2%)    | 0 (0%)    | 0 (0%)   | 0 (0%)   | 4 (0.8%)     | 3 (0.6%) | 0 (0%)   | 0 (0%)   |
| General physical health deterioration            | 3 (0.5%)    | 2 (0.4%)  | 0 (0%)   | 0 (0%)   | 0 (0%)       | 2 (0.4%) | 0 (0%)   | 1 (0.2%) |

| Event Term                          | Chemo alone |          |          |          | Chemo + SIRT |          |          |          |
|-------------------------------------|-------------|----------|----------|----------|--------------|----------|----------|----------|
|                                     | 1 and 2     | 3        | 4        | 5        | 1 and 2      | 3        | 4        | 5        |
| Large intestinal obstruction        | 0 (0%)      | 5 (0.9%) | 1 (0.2%) | 0 (0%)   | 0 (0%)       | 1 (0.2%) | 1 (0.2%) | 0 (0%)   |
| Malaise                             | 3 (0.5%)    | 1 (0.2%) | 0 (0%)   | 0 (0%)   | 3 (0.6%)     | 0 (0%)   | 1 (0.2%) | 0 (0%)   |
| Presyncope                          | 1 (0.2%)    | 0 (0%)   | 0 (0%)   | 0 (0%)   | 4 (0.8%)     | 3 (0.6%) | 0 (0%)   | 0 (0%)   |
| Respiratory tract infection         | 5 (0.9%)    | 0 (0%)   | 0 (0%)   | 1 (0.2%) | 2 (0.4%)     | 0 (0%)   | 0 (0%)   | 0 (0%)   |
| Urinary retention                   | 3 (0.5%)    | 0 (0%)   | 0 (0%)   | 0 (0%)   | 3 (0.6%)     | 2 (0.4%) | 0 (0%)   | 0 (0%)   |
| Visual impairment                   | 4 (0.7%)    | 0 (0%)   | 0 (0%)   | 0 (0%)   | 3 (0.6%)     | 1 (0.2%) | 0 (0%)   | 0 (0%)   |
| Acute myocardial infarction         | 0 (0%)      | 0 (0%)   | 2 (0.4%) | 1 (0.2%) | 0 (0%)       | 2 (0.4%) | 2 (0.4%) | 0 (0%)   |
| Anal fissure                        | 3 (0.5%)    | 1 (0.2%) | 0 (0%)   | 0 (0%)   | 3 (0.6%)     | 0 (0%)   | 0 (0%)   | 0 (0%)   |
| Angina pectoris                     | 2 (0.4%)    | 2 (0.4%) | 0 (0%)   | 0 (0%)   | 2 (0.4%)     | 1 (0.2%) | 0 (0%)   | 0 (0%)   |
| Artery dissection                   | 0 (0%)      | 0 (0%)   | 0 (0%)   | 0 (0%)   | 6 (1.2%)     | 1 (0.2%) | 0 (0%)   | 0 (0%)   |
| Diabetes mellitus                   | 3 (0.5%)    | 0 (0%)   | 1 (0.2%) | 0 (0%)   | 1 (0.2%)     | 1 (0.2%) | 1 (0.2%) | 0 (0%)   |
| Frequent bowel movements            | 3 (0.5%)    | 0 (0%)   | 0 (0%)   | 0 (0%)   | 3 (0.6%)     | 1 (0.2%) | 0 (0%)   | 0 (0%)   |
| Gamma-glutamyltransferase increased | 1 (0.2%)    | 1 (0.2%) | 0 (0%)   | 0 (0%)   | 2 (0.4%)     | 3 (0.6%) | 0 (0%)   | 0 (0%)   |
| Gastrointestinal stoma complication | 4 (0.7%)    | 0 (0%)   | 1 (0.2%) | 0 (0%)   | 2 (0.4%)     | 0 (0%)   | 0 (0%)   | 0 (0%)   |
| Groin pain                          | 2 (0.4%)    | 1 (0.2%) | 0 (0%)   | 0 (0%)   | 4 (0.8%)     | 0 (0%)   | 0 (0%)   | 0 (0%)   |
| Hyperbilirubinaemia                 | 1 (0.2%)    | 1 (0.2%) | 0 (0%)   | 0 (0%)   | 2 (0.4%)     | 3 (0.6%) | 0 (0%)   | 0 (0%)   |
| Hypercalcaemia                      | 3 (0.5%)    | 1 (0.2%) | 0 (0%)   | 0 (0%)   | 2 (0.4%)     | 0 (0%)   | 1 (0.2%) | 0 (0%)   |
| Thrombosis in device                | 2 (0.4%)    | 1 (0.2%) | 0 (0%)   | 0 (0%)   | 3 (0.6%)     | 1 (0.2%) | 0 (0%)   | 0 (0%)   |
| Asthma                              | 2 (0.4%)    | 1 (0.2%) | 0 (0%)   | 0 (0%)   | 2 (0.4%)     | 1 (0.2%) | 0 (0%)   | 0 (0%)   |
| Gastrointestinal haemorrhage        | 0 (0%)      | 0 (0%)   | 1 (0.2%) | 0 (0%)   | 2 (0.4%)     | 1 (0.2%) | 2 (0.4%) | 0 (0%)   |
| Hypoglycaemia                       | 1 (0.2%)    | 1 (0.2%) | 0 (0%)   | 0 (0%)   | 3 (0.6%)     | 0 (0%)   | 1 (0.2%) | 0 (0%)   |
| Infusion related reaction           | 1 (0.2%)    | 1 (0.2%) | 0 (0%)   | 0 (0%)   | 4 (0.8%)     | 0 (0%)   | 0 (0%)   | 0 (0%)   |
| Infusion site pain                  | 2 (0.4%)    | 1 (0.2%) | 0 (0%)   | 0 (0%)   | 3 (0.6%)     | 0 (0%)   | 0 (0%)   | 0 (0%)   |
| Liver function test abnormal        | 0 (0%)      | 2 (0.4%) | 0 (0%)   | 0 (0%)   | 2 (0.4%)     | 2 (0.4%) | 0 (0%)   | 0 (0%)   |
| Medical device complication         | 2 (0.4%)    | 1 (0.2%) | 0 (0%)   | 0 (0%)   | 3 (0.6%)     | 0 (0%)   | 0 (0%)   | 0 (0%)   |
| Radiation hepatitis                 | 0 (0%)      | 0 (0%)   | 0 (0%)   | 0 (0%)   | 2 (0.4%)     | 2 (0.4%) | 0 (0%)   | 2 (0.4%) |
| Wound infection                     | 3 (0.5%)    | 0 (0%)   | 0 (0%)   | 0 (0%)   | 2 (0.4%)     | 1 (0.2%) | 0 (0%)   | 0 (0%)   |
| Arteriospasm coronary               | 0 (0%)      | 1 (0.2%) | 0 (0%)   | 0 (0%)   | 1 (0.2%)     | 2 (0.4%) | 1 (0.2%) | 0 (0%)   |
| Device dislocation                  | 2 (0.4%)    | 1 (0.2%) | 0 (0%)   | 0 (0%)   | 1 (0.2%)     | 0 (0%)   | 1 (0.2%) | 0 (0%)   |
| Duodenitis                          | 0 (0%)      | 0 (0%)   | 0 (0%)   | 0 (0%)   | 4 (0.8%)     | 1 (0.2%) | 0 (0%)   | 0 (0%)   |
| Embolism                            | 1 (0.2%)    | 1 (0.2%) | 0 (0%)   | 0 (0%)   | 0 (0%)       | 2 (0.4%) | 1 (0.2%) | 0 (0%)   |
| Neutropenic infection               | 1 (0.2%)    | 1 (0.2%) | 0 (0%)   | 0 (0%)   | 0 (0%)       | 3 (0.6%) | 0 (0%)   | 0 (0%)   |
| Pancytopenia                        | 0 (0%)      | 1 (0.2%) | 0 (0%)   | 0 (0%)   | 1 (0.2%)     | 1 (0.2%) | 2 (0.4%) | 0 (0%)   |
| Phlebitis                           | 2 (0.4%)    | 1 (0.2%) | 0 (0%)   | 0 (0%)   | 2 (0.4%)     | 0 (0%)   | 0 (0%)   | 0 (0%)   |
| Tooth extraction                    | 4 (0.7%)    | 1 (0.2%) | 0 (0%)   | 0 (0%)   | 0 (0%)       | 0 (0%)   | 0 (0%)   | 0 (0%)   |
| Administration related reaction     | 1 (0.2%)    | 0 (0%)   | 0 (0%)   | 0 (0%)   | 1 (0.2%)     | 2 (0.4%) | 0 (0%)   | 0 (0%)   |
| Anal abscess                        | 1 (0.2%)    | 1 (0.2%) | 0 (0%)   | 0 (0%)   | 1 (0.2%)     | 1 (0.2%) | 0 (0%)   | 0 (0%)   |
| Arterial spasm                      | 1 (0.2%)    | 0 (0%)   | 0 (0%)   | 0 (0%)   | 2 (0.4%)     | 1 (0.2%) | 0 (0%)   | 0 (0%)   |
| Atrial fibrillation                 | 0 (0%)      | 0 (0%)   | 0 (0%)   | 0 (0%)   | 3 (0.6%)     | 1 (0.2%) | 0 (0%)   | 0 (0%)   |
| Blood glucose increased             | 0 (0%)      | 2 (0.4%) | 0 (0%)   | 0 (0%)   | 1 (0.2%)     | 0 (0%)   | 1 (0.2%) | 0 (0%)   |
| Blood phosphorus decreased          | 1 (0.2%)    | 2 (0.4%) | 0 (0%)   | 0 (0%)   | 0 (0%)       | 1 (0.2%) | 0 (0%)   | 0 (0%)   |
| Blood urea increased                | 2 (0.4%)    | 1 (0.2%) | 0 (0%)   | 0 (0%)   | 1 (0.2%)     | 0 (0%)   | 0 (0%)   | 0 (0%)   |
| Cardiac failure                     | 1 (0.2%)    | 1 (0.2%) | 0 (0%)   | 0 (0%)   | 1 (0.2%)     | 1 (0.2%) | 0 (0%)   | 0 (0%)   |
| Cellulitis                          | 2 (0.4%)    | 1 (0.2%) | 0 (0%)   | 0 (0%)   | 0 (0%)       | 1 (0.2%) | 0 (0%)   | 0 (0%)   |

| Event Term                               | Chemo alone |          |          |          | Chemo + SIRT |          |          |          |
|------------------------------------------|-------------|----------|----------|----------|--------------|----------|----------|----------|
|                                          | 1 and 2     | 3        | 4        | 5        | 1 and 2      | 3        | 4        | 5        |
| Cholangitis                              | 1 (0.2%)    | 1 (0.2%) | 0 (0%)   | 0 (0%)   | 0 (0%)       | 2 (0.4%) | 0 (0%)   | 0 (0%)   |
| Decubitus ulcer                          | 1 (0.2%)    | 0 (0%)   | 0 (0%)   | 0 (0%)   | 2 (0.4%)     | 1 (0.2%) | 0 (0%)   | 0 (0%)   |
| Delirium                                 | 1 (0.2%)    | 2 (0.4%) | 0 (0%)   | 0 (0%)   | 1 (0.2%)     | 0 (0%)   | 0 (0%)   | 0 (0%)   |
| Device occlusion                         | 1 (0.2%)    | 2 (0.4%) | 0 (0%)   | 0 (0%)   | 1 (0.2%)     | 0 (0%)   | 0 (0%)   | 0 (0%)   |
| Incisional hernia                        | 2 (0.4%)    | 0 (0%)   | 0 (0%)   | 0 (0%)   | 1 (0.2%)     | 1 (0.2%) | 0 (0%)   | 0 (0%)   |
| International normalised ratio increased | 1 (0.2%)    | 1 (0.2%) | 0 (0%)   | 0 (0%)   | 1 (0.2%)     | 1 (0.2%) | 0 (0%)   | 0 (0%)   |
| Large intestine perforation              | 0 (0%)      | 2 (0.4%) | 0 (0%)   | 1 (0.2%) | 0 (0%)       | 0 (0%)   | 1 (0.2%) | 0 (0%)   |
| Leukocytosis                             | 1 (0.2%)    | 2 (0.4%) | 0 (0%)   | 0 (0%)   | 1 (0.2%)     | 0 (0%)   | 0 (0%)   | 0 (0%)   |
| Myocardial infarction                    | 0 (0%)      | 1 (0.2%) | 1 (0.2%) | 0 (0%)   | 0 (0%)       | 1 (0.2%) | 1 (0.2%) | 0 (0%)   |
| Myocardial ischaemia                     | 1 (0.2%)    | 1 (0.2%) | 0 (0%)   | 0 (0%)   | 1 (0.2%)     | 1 (0.2%) | 0 (0%)   | 0 (0%)   |
| Oesophageal candidiasis                  | 0 (0%)      | 1 (0.2%) | 0 (0%)   | 0 (0%)   | 2 (0.4%)     | 1 (0.2%) | 0 (0%)   | 0 (0%)   |
| Portal vein thrombosis                   | 0 (0%)      | 1 (0.2%) | 0 (0%)   | 0 (0%)   | 2 (0.4%)     | 0 (0%)   | 0 (0%)   | 1 (0.2%) |
| Post embolisation syndrome               | 1 (0.2%)    | 0 (0%)   | 0 (0%)   | 0 (0%)   | 1 (0.2%)     | 2 (0.4%) | 0 (0%)   | 0 (0%)   |
| Renal failure                            | 3 (0.5%)    | 1 (0.2%) | 0 (0%)   | 0 (0%)   | 0 (0%)       | 0 (0%)   | 0 (0%)   | 0 (0%)   |
| Somnolence                               | 0 (0%)      | 1 (0.2%) | 0 (0%)   | 0 (0%)   | 2 (0.4%)     | 1 (0.2%) | 0 (0%)   | 0 (0%)   |
| White blood cell count                   | 0 (0%)      | 0 (0%)   | 0 (0%)   | 0 (0%)   | 2 (0.4%)     | 1 (0.2%) | 1 (0.2%) | 0 (0%)   |
| Acidosis                                 | 1 (0.2%)    | 0 (0%)   | 1 (0.2%) | 0 (0%)   | 1 (0.2%)     | 0 (0%)   | 0 (0%)   | 0 (0%)   |
| Adverse drug reaction                    | 1 (0.2%)    | 1 (0.2%) | 0 (0%)   | 0 (0%)   | 0 (0%)       | 1 (0.2%) | 0 (0%)   | 0 (0%)   |
| Cachexia                                 | 1 (0.2%)    | 1 (0.2%) | 0 (0%)   | 0 (0%)   | 1 (0.2%)     | 0 (0%)   | 0 (0%)   | 0 (0%)   |
| Campylobacter gastroenteritis            | 0 (0%)      | 1 (0.2%) | 0 (0%)   | 0 (0%)   | 1 (0.2%)     | 1 (0.2%) | 0 (0%)   | 0 (0%)   |
| Chronic obstructive pulmonary disease    | 1 (0.2%)    | 0 (0%)   | 0 (0%)   | 0 (0%)   | 1 (0.2%)     | 0 (0%)   | 0 (0%)   | 1 (0.2%) |
| Hepatic function abnormal                | 1 (0.2%)    | 0 (0%)   | 0 (0%)   | 0 (0%)   | 0 (0%)       | 2 (0.4%) | 0 (0%)   | 0 (0%)   |
| Hernia                                   | 0 (0%)      | 0 (0%)   | 0 (0%)   | 0 (0%)   | 2 (0.4%)     | 1 (0.2%) | 0 (0%)   | 0 (0%)   |
| Hyperkalaemia                            | 1 (0.2%)    | 1 (0.2%) | 0 (0%)   | 0 (0%)   | 0 (0%)       | 0 (0%)   | 1 (0.2%) | 0 (0%)   |
| Hypermagnesaemia                         | 1 (0.2%)    | 1 (0.2%) | 0 (0%)   | 0 (0%)   | 1 (0.2%)     | 0 (0%)   | 0 (0%)   | 0 (0%)   |
| Ileus                                    | 0 (0%)      | 3 (0.5%) | 0 (0%)   | 0 (0%)   | 0 (0%)       | 0 (0%)   | 0 (0%)   | 0 (0%)   |
| Joint injury                             | 1 (0.2%)    | 0 (0%)   | 0 (0%)   | 0 (0%)   | 1 (0.2%)     | 1 (0.2%) | 0 (0%)   | 0 (0%)   |
| Jugular vein thrombosis                  | 1 (0.2%)    | 1 (0.2%) | 0 (0%)   | 0 (0%)   | 0 (0%)       | 1 (0.2%) | 0 (0%)   | 0 (0%)   |
| Lung infection                           | 1 (0.2%)    | 0 (0%)   | 0 (0%)   | 0 (0%)   | 0 (0%)       | 1 (0.2%) | 1 (0.2%) | 0 (0%)   |
| Pancreatitis                             | 0 (0%)      | 0 (0%)   | 0 (0%)   | 0 (0%)   | 1 (0.2%)     | 2 (0.4%) | 0 (0%)   | 0 (0%)   |
| Toxicity to various agents               | 1 (0.2%)    | 0 (0%)   | 0 (0%)   | 1 (0.2%) | 0 (0%)       | 1 (0.2%) | 0 (0%)   | 0 (0%)   |
| Tumour pain                              | 2 (0.4%)    | 0 (0%)   | 0 (0%)   | 0 (0%)   | 0 (0%)       | 1 (0.2%) | 0 (0%)   | 0 (0%)   |
| Acute coronary syndrome                  | 0 (0%)      | 0 (0%)   | 0 (0%)   | 0 (0%)   | 1 (0.2%)     | 0 (0%)   | 1 (0.2%) | 0 (0%)   |
| Anaphylactic reaction                    | 0 (0%)      | 1 (0.2%) | 0 (0%)   | 0 (0%)   | 0 (0%)       | 1 (0.2%) | 0 (0%)   | 0 (0%)   |
| Aphasia                                  | 0 (0%)      | 0 (0%)   | 0 (0%)   | 0 (0%)   | 1 (0.2%)     | 1 (0.2%) | 0 (0%)   | 0 (0%)   |
| Atrial tachycardia                       | 0 (0%)      | 0 (0%)   | 0 (0%)   | 0 (0%)   | 1 (0.2%)     | 1 (0.2%) | 0 (0%)   | 0 (0%)   |
| Blood sodium decreased                   | 0 (0%)      | 0 (0%)   | 0 (0%)   | 0 (0%)   | 1 (0.2%)     | 1 (0.2%) | 0 (0%)   | 0 (0%)   |
| Bone marrow failure                      | 1 (0.2%)    | 1 (0.2%) | 0 (0%)   | 0 (0%)   | 0 (0%)       | 0 (0%)   | 0 (0%)   | 0 (0%)   |
| Cataract                                 | 0 (0%)      | 0 (0%)   | 0 (0%)   | 0 (0%)   | 1 (0.2%)     | 1 (0.2%) | 0 (0%)   | 0 (0%)   |
| Catheter site infection                  | 1 (0.2%)    | 1 (0.2%) | 0 (0%)   | 0 (0%)   | 0 (0%)       | 0 (0%)   | 0 (0%)   | 0 (0%)   |
| Cerebral haemorrhage                     | 1 (0.2%)    | 0 (0%)   | 0 (0%)   | 1 (0.2%) | 0 (0%)       | 0 (0%)   | 0 (0%)   | 0 (0%)   |
| Cerebrovascular accident                 | 0 (0%)      | 0 (0%)   | 1 (0.2%) | 0 (0%)   | 0 (0%)       | 0 (0%)   | 1 (0.2%) | 0 (0%)   |
| Colitis                                  | 0 (0%)      | 1 (0.2%) | 0 (0%)   | 0 (0%)   | 0 (0%)       | 1 (0.2%) | 0 (0%)   | 0 (0%)   |
| Diverticulitis                           | 0 (0%)      | 1 (0.2%) | 0 (0%)   | 0 (0%)   | 1 (0.2%)     | 0 (0%)   | 0 (0%)   | 0 (0%)   |
| Dyskinesia                               | 0 (0%)      | 1 (0.2%) | 0 (0%)   | 0 (0%)   | 1 (0.2%)     | 0 (0%)   | 0 (0%)   | 0 (0%)   |
| Ear infection                            | 0 (0%)      | 1 (0.2%) | 0 (0%)   | 0 (0%)   | 1 (0.2%)     | 0 (0%)   | 0 (0%)   | 0 (0%)   |
| Escherichia sepsis                       | 0 (0%)      | 0 (0%)   | 0 (0%)   | 1 (0.2%) | 0 (0%)       | 1 (0.2%) | 0 (0%)   | 0 (0%)   |
| Faecal volume increased                  | 0 (0%)      | 2 (0.4%) | 0 (0%)   | 0 (0%)   | 0 (0%)       | 0 (0%)   | 0 (0%)   | 0 (0%)   |
| Gastric haemorrhage                      | 0 (0%)      | 0 (0%)   | 0 (0%)   | 0 (0%)   | 1 (0.2%)     | 1 (0.2%) | 0 (0%)   | 0 (0%)   |

| Event Term                            | Chemo alone |          |          |          | Chemo + SIRT |          |          |          |
|---------------------------------------|-------------|----------|----------|----------|--------------|----------|----------|----------|
|                                       | 1 and 2     | 3        | 4        | 5        | 1 and 2      | 3        | 4        | 5        |
| Gastroenteritis radiation             | 0 (0%)      | 1 (0.2%) | 0 (0%)   | 0 (0%)   | 0 (0%)       | 1 (0.2%) | 0 (0%)   | 0 (0%)   |
| Gastrointestinal pain                 | 0 (0%)      | 0 (0%)   | 0 (0%)   | 0 (0%)   | 1 (0.2%)     | 1 (0.2%) | 0 (0%)   | 0 (0%)   |
| Heart rate irregular                  | 0 (0%)      | 0 (0%)   | 0 (0%)   | 0 (0%)   | 1 (0.2%)     | 1 (0.2%) | 0 (0%)   | 0 (0%)   |
| Hepatic encephalopathy                | 0 (0%)      | 0 (0%)   | 0 (0%)   | 0 (0%)   | 0 (0%)       | 2 (0.4%) | 0 (0%)   | 0 (0%)   |
| Hepatic failure                       | 0 (0%)      | 0 (0%)   | 0 (0%)   | 0 (0%)   | 0 (0%)       | 1 (0.2%) | 0 (0%)   | 1 (0.2%) |
| Hip fracture                          | 0 (0%)      | 0 (0%)   | 0 (0%)   | 0 (0%)   | 1 (0.2%)     | 1 (0.2%) | 0 (0%)   | 0 (0%)   |
| Hypovolaemia                          | 0 (0%)      | 0 (0%)   | 0 (0%)   | 0 (0%)   | 1 (0.2%)     | 1 (0.2%) | 0 (0%)   | 0 (0%)   |
| Jaundice                              | 0 (0%)      | 2 (0.4%) | 0 (0%)   | 0 (0%)   | 0 (0%)       | 0 (0%)   | 0 (0%)   | 0 (0%)   |
| Jaundice cholestatic                  | 0 (0%)      | 0 (0%)   | 0 (0%)   | 0 (0%)   | 0 (0%)       | 2 (0.4%) | 0 (0%)   | 0 (0%)   |
| Left ventricular dysfunction          | 0 (0%)      | 1 (0.2%) | 0 (0%)   | 0 (0%)   | 0 (0%)       | 0 (0%)   | 1 (0.2%) | 0 (0%)   |
| Lobar pneumonia                       | 0 (0%)      | 1 (0.2%) | 0 (0%)   | 0 (0%)   | 1 (0.2%)     | 0 (0%)   | 0 (0%)   | 0 (0%)   |
| Malnutrition                          | 0 (0%)      | 0 (0%)   | 0 (0%)   | 0 (0%)   | 1 (0.2%)     | 0 (0%)   | 1 (0.2%) | 0 (0%)   |
| Metastatic pain                       | 0 (0%)      | 2 (0.4%) | 0 (0%)   | 0 (0%)   | 0 (0%)       | 0 (0%)   | 0 (0%)   | 0 (0%)   |
| Muscle strain                         | 0 (0%)      | 0 (0%)   | 0 (0%)   | 0 (0%)   | 1 (0.2%)     | 1 (0.2%) | 0 (0%)   | 0 (0%)   |
| Pathological fracture                 | 0 (0%)      | 2 (0.4%) | 0 (0%)   | 0 (0%)   | 0 (0%)       | 0 (0%)   | 0 (0%)   | 0 (0%)   |
| Performance status decreased          | 1 (0.2%)    | 0 (0%)   | 1 (0.2%) | 0 (0%)   | 0 (0%)       | 0 (0%)   | 0 (0%)   | 0 (0%)   |
| Peripheral artery thrombosis          | 0 (0%)      | 0 (0%)   | 0 (0%)   | 0 (0%)   | 0 (0%)       | 1 (0.2%) | 1 (0.2%) | 0 (0%)   |
| Peritonitis                           | 0 (0%)      | 0 (0%)   | 0 (0%)   | 0 (0%)   | 0 (0%)       | 1 (0.2%) | 0 (0%)   | 1 (0.2%) |
| Pneumonia aspiration                  | 0 (0%)      | 0 (0%)   | 0 (0%)   | 1 (0.2%) | 1 (0.2%)     | 0 (0%)   | 0 (0%)   | 0 (0%)   |
| Pneumonitis                           | 0 (0%)      | 0 (0%)   | 2 (0.4%) | 0 (0%)   | 0 (0%)       | 0 (0%)   | 0 (0%)   | 0 (0%)   |
| Pneumothorax                          | 1 (0.2%)    | 0 (0%)   | 1 (0.2%) | 0 (0%)   | 0 (0%)       | 0 (0%)   | 0 (0%)   | 0 (0%)   |
| Portal hypertension                   | 1 (0.2%)    | 0 (0%)   | 0 (0%)   | 0 (0%)   | 0 (0%)       | 1 (0.2%) | 0 (0%)   | 0 (0%)   |
| Rectal stenosis                       | 0 (0%)      | 1 (0.2%) | 0 (0%)   | 0 (0%)   | 0 (0%)       | 1 (0.2%) | 0 (0%)   | 0 (0%)   |
| Respiratory failure                   | 0 (0%)      | 0 (0%)   | 1 (0.2%) | 0 (0%)   | 0 (0%)       | 0 (0%)   | 0 (0%)   | 1 (0.2%) |
| Skin exfoliation                      | 0 (0%)      | 1 (0.2%) | 0 (0%)   | 0 (0%)   | 1 (0.2%)     | 0 (0%)   | 0 (0%)   | 0 (0%)   |
| Small intestinal obstruction          | 0 (0%)      | 0 (0%)   | 0 (0%)   | 0 (0%)   | 0 (0%)       | 1 (0.2%) | 1 (0.2%) | 0 (0%)   |
| Spinal fracture                       | 0 (0%)      | 1 (0.2%) | 0 (0%)   | 0 (0%)   | 0 (0%)       | 1 (0.2%) | 0 (0%)   | 0 (0%)   |
| Suicidal ideation                     | 1 (0.2%)    | 0 (0%)   | 1 (0.2%) | 0 (0%)   | 0 (0%)       | 0 (0%)   | 0 (0%)   | 0 (0%)   |
| Venous thrombosis limb                | 0 (0%)      | 1 (0.2%) | 0 (0%)   | 0 (0%)   | 1 (0.2%)     | 0 (0%)   | 0 (0%)   | 0 (0%)   |
| Abdominal sepsis                      | 0 (0%)      | 0 (0%)   | 1 (0.2%) | 0 (0%)   | 0 (0%)       | 0 (0%)   | 0 (0%)   | 0 (0%)   |
| Abdominal strangulated hernia         | 0 (0%)      | 1 (0.2%) | 0 (0%)   | 0 (0%)   | 0 (0%)       | 0 (0%)   | 0 (0%)   | 0 (0%)   |
| Abscess limb                          | 0 (0%)      | 1 (0.2%) | 0 (0%)   | 0 (0%)   | 0 (0%)       | 0 (0%)   | 0 (0%)   | 0 (0%)   |
| Activated partial thromboplastin time | 0 (0%)      | 0 (0%)   | 0 (0%)   | 0 (0%)   | 0 (0%)       | 1 (0.2%) | 0 (0%)   | 0 (0%)   |
| Acute respiratory distress syndrome   | 0 (0%)      | 0 (0%)   | 1 (0.2%) | 0 (0%)   | 0 (0%)       | 0 (0%)   | 0 (0%)   | 0 (0%)   |
| Alkalosis                             | 0 (0%)      | 1 (0.2%) | 0 (0%)   | 0 (0%)   | 0 (0%)       | 0 (0%)   | 0 (0%)   | 0 (0%)   |
| Amylase increased                     | 0 (0%)      | 0 (0%)   | 0 (0%)   | 0 (0%)   | 0 (0%)       | 1 (0.2%) | 0 (0%)   | 0 (0%)   |
| Anastomotic complication              | 0 (0%)      | 1 (0.2%) | 0 (0%)   | 0 (0%)   | 0 (0%)       | 0 (0%)   | 0 (0%)   | 0 (0%)   |
| Anastomotic leak                      | 0 (0%)      | 0 (0%)   | 1 (0.2%) | 0 (0%)   | 0 (0%)       | 0 (0%)   | 0 (0%)   | 0 (0%)   |
| Anorectal infection                   | 0 (0%)      | 0 (0%)   | 0 (0%)   | 0 (0%)   | 0 (0%)       | 1 (0.2%) | 0 (0%)   | 0 (0%)   |
| Arterial injury                       | 0 (0%)      | 0 (0%)   | 0 (0%)   | 0 (0%)   | 0 (0%)       | 1 (0.2%) | 0 (0%)   | 0 (0%)   |
| Atrial flutter                        | 0 (0%)      | 0 (0%)   | 0 (0%)   | 0 (0%)   | 0 (0%)       | 1 (0.2%) | 0 (0%)   | 0 (0%)   |
| Atrioventricular block complete       | 0 (0%)      | 0 (0%)   | 1 (0.2%) | 0 (0%)   | 0 (0%)       | 0 (0%)   | 0 (0%)   | 0 (0%)   |
| Bile duct stone                       | 0 (0%)      | 1 (0.2%) | 0 (0%)   | 0 (0%)   | 0 (0%)       | 0 (0%)   | 0 (0%)   | 0 (0%)   |
| Biliary tract infection               | 0 (0%)      | 0 (0%)   | 0 (0%)   | 0 (0%)   | 0 (0%)       | 1 (0.2%) | 0 (0%)   | 0 (0%)   |
| Blood bicarbonate increased           | 0 (0%)      | 1 (0.2%) | 0 (0%)   | 0 (0%)   | 0 (0%)       | 0 (0%)   | 0 (0%)   | 0 (0%)   |
| Blood bilirubin abnormal              | 0 (0%)      | 0 (0%)   | 0 (0%)   | 0 (0%)   | 0 (0%)       | 0 (0%)   | 1 (0.2%) | 0 (0%)   |

| Event Term                             | Chemo alone |          |          |          | Chemo + SIRT |          |          |        |
|----------------------------------------|-------------|----------|----------|----------|--------------|----------|----------|--------|
|                                        | 1 and 2     | 3        | 4        | 5        | 1 and 2      | 3        | 4        | 5      |
| Blood creatine phosphokinase increased | 0 (0%)      | 0 (0%)   | 1 (0.2%) | 0 (0%)   | 0 (0%)       | 0 (0%)   | 0 (0%)   | 0 (0%) |
| Breast cancer                          | 0 (0%)      | 0 (0%)   | 1 (0.2%) | 0 (0%)   | 0 (0%)       | 0 (0%)   | 0 (0%)   | 0 (0%) |
| Bronchial obstruction                  | 0 (0%)      | 0 (0%)   | 1 (0.2%) | 0 (0%)   | 0 (0%)       | 0 (0%)   | 0 (0%)   | 0 (0%) |
| Cardiac arrest                         | 0 (0%)      | 0 (0%)   | 0 (0%)   | 1 (0.2%) | 0 (0%)       | 0 (0%)   | 0 (0%)   | 0 (0%) |
| Cardiotoxicity                         | 0 (0%)      | 0 (0%)   | 0 (0%)   | 0 (0%)   | 0 (0%)       | 1 (0.2%) | 0 (0%)   | 0 (0%) |
| Cerebellar syndrome                    | 0 (0%)      | 0 (0%)   | 0 (0%)   | 0 (0%)   | 0 (0%)       | 1 (0.2%) | 0 (0%)   | 0 (0%) |
| Cerebral infarction                    | 0 (0%)      | 0 (0%)   | 0 (0%)   | 0 (0%)   | 0 (0%)       | 1 (0.2%) | 0 (0%)   | 0 (0%) |
| Cerebral ischaemia                     | 0 (0%)      | 1 (0.2%) | 0 (0%)   | 0 (0%)   | 0 (0%)       | 0 (0%)   | 0 (0%)   | 0 (0%) |
| Cholecystitis acute                    | 0 (0%)      | 0 (0%)   | 0 (0%)   | 0 (0%)   | 0 (0%)       | 1 (0.2%) | 0 (0%)   | 0 (0%) |
| Cholelithiasis                         | 0 (0%)      | 1 (0.2%) | 0 (0%)   | 0 (0%)   | 0 (0%)       | 0 (0%)   | 0 (0%)   | 0 (0%) |
| Clostridium difficile infection        | 0 (0%)      | 0 (0%)   | 0 (0%)   | 0 (0%)   | 0 (0%)       | 1 (0.2%) | 0 (0%)   | 0 (0%) |
| Colon neoplasm                         | 0 (0%)      | 1 (0.2%) | 0 (0%)   | 0 (0%)   | 0 (0%)       | 0 (0%)   | 0 (0%)   | 0 (0%) |
| Colonic abscess                        | 0 (0%)      | 1 (0.2%) | 0 (0%)   | 0 (0%)   | 0 (0%)       | 0 (0%)   | 0 (0%)   | 0 (0%) |
| Contrast media allergy                 | 0 (0%)      | 1 (0.2%) | 0 (0%)   | 0 (0%)   | 0 (0%)       | 0 (0%)   | 0 (0%)   | 0 (0%) |
| Contrast media reaction                | 0 (0%)      | 1 (0.2%) | 0 (0%)   | 0 (0%)   | 0 (0%)       | 0 (0%)   | 0 (0%)   | 0 (0%) |
| Deep vein thrombosis postoperative     | 0 (0%)      | 0 (0%)   | 0 (0%)   | 0 (0%)   | 0 (0%)       | 1 (0.2%) | 0 (0%)   | 0 (0%) |
| Device related sepsis                  | 0 (0%)      | 1 (0.2%) | 0 (0%)   | 0 (0%)   | 0 (0%)       | 0 (0%)   | 0 (0%)   | 0 (0%) |
| Diabetes mellitus inadequate control   | 0 (0%)      | 0 (0%)   | 0 (0%)   | 0 (0%)   | 0 (0%)       | 1 (0.2%) | 0 (0%)   | 0 (0%) |
| Diabetic complication                  | 0 (0%)      | 0 (0%)   | 0 (0%)   | 1 (0.2%) | 0 (0%)       | 0 (0%)   | 0 (0%)   | 0 (0%) |
| Diabetic ketoacidosis                  | 0 (0%)      | 0 (0%)   | 1 (0.2%) | 0 (0%)   | 0 (0%)       | 0 (0%)   | 0 (0%)   | 0 (0%) |
| Duodenal perforation                   | 0 (0%)      | 0 (0%)   | 0 (0%)   | 0 (0%)   | 0 (0%)       | 1 (0.2%) | 0 (0%)   | 0 (0%) |
| Duodenal ulcer haemorrhage             | 0 (0%)      | 0 (0%)   | 1 (0.2%) | 0 (0%)   | 0 (0%)       | 0 (0%)   | 0 (0%)   | 0 (0%) |
| Dyslipidaemia                          | 0 (0%)      | 1 (0.2%) | 0 (0%)   | 0 (0%)   | 0 (0%)       | 0 (0%)   | 0 (0%)   | 0 (0%) |
| Enteritis infectious                   | 0 (0%)      | 1 (0.2%) | 0 (0%)   | 0 (0%)   | 0 (0%)       | 0 (0%)   | 0 (0%)   | 0 (0%) |
| Enterococcal infection                 | 0 (0%)      | 1 (0.2%) | 0 (0%)   | 0 (0%)   | 0 (0%)       | 0 (0%)   | 0 (0%)   | 0 (0%) |
| Enterococcal sepsis                    | 0 (0%)      | 0 (0%)   | 0 (0%)   | 0 (0%)   | 0 (0%)       | 0 (0%)   | 1 (0.2%) | 0 (0%) |
| Erythema multiforme                    | 0 (0%)      | 1 (0.2%) | 0 (0%)   | 0 (0%)   | 0 (0%)       | 0 (0%)   | 0 (0%)   | 0 (0%) |
| Escherichia bacteraemia                | 0 (0%)      | 0 (0%)   | 0 (0%)   | 0 (0%)   | 0 (0%)       | 1 (0.2%) | 0 (0%)   | 0 (0%) |
| Escherichia urinary tract infection    | 0 (0%)      | 0 (0%)   | 0 (0%)   | 0 (0%)   | 0 (0%)       | 1 (0.2%) | 0 (0%)   | 0 (0%) |
| Face injury                            | 0 (0%)      | 1 (0.2%) | 0 (0%)   | 0 (0%)   | 0 (0%)       | 0 (0%)   | 0 (0%)   | 0 (0%) |
| Faecaloma                              | 0 (0%)      | 1 (0.2%) | 0 (0%)   | 0 (0%)   | 0 (0%)       | 0 (0%)   | 0 (0%)   | 0 (0%) |
| Femoral artery occlusion               | 0 (0%)      | 1 (0.2%) | 0 (0%)   | 0 (0%)   | 0 (0%)       | 0 (0%)   | 0 (0%)   | 0 (0%) |
| Femoral neck fracture                  | 0 (0%)      | 0 (0%)   | 0 (0%)   | 0 (0%)   | 0 (0%)       | 1 (0.2%) | 0 (0%)   | 0 (0%) |
| Gastritis atrophic                     | 0 (0%)      | 0 (0%)   | 0 (0%)   | 0 (0%)   | 0 (0%)       | 1 (0.2%) | 0 (0%)   | 0 (0%) |
| Gastritis erosive                      | 0 (0%)      | 1 (0.2%) | 0 (0%)   | 0 (0%)   | 0 (0%)       | 0 (0%)   | 0 (0%)   | 0 (0%) |
| Gastroduodenitis                       | 0 (0%)      | 0 (0%)   | 0 (0%)   | 0 (0%)   | 0 (0%)       | 1 (0.2%) | 0 (0%)   | 0 (0%) |
| Gastroenteritis salmonella             | 0 (0%)      | 0 (0%)   | 0 (0%)   | 0 (0%)   | 0 (0%)       | 1 (0.2%) | 0 (0%)   | 0 (0%) |
| Gastrointestinal surgery               | 0 (0%)      | 0 (0%)   | 0 (0%)   | 0 (0%)   | 0 (0%)       | 1 (0.2%) | 0 (0%)   | 0 (0%) |
| Glaucoma surgery                       | 0 (0%)      | 1 (0.2%) | 0 (0%)   | 0 (0%)   | 0 (0%)       | 0 (0%)   | 0 (0%)   | 0 (0%) |
| Granulocyte count decreased            | 0 (0%)      | 1 (0.2%) | 0 (0%)   | 0 (0%)   | 0 (0%)       | 0 (0%)   | 0 (0%)   | 0 (0%) |
| Helicobacter test positive             | 0 (0%)      | 0 (0%)   | 0 (0%)   | 0 (0%)   | 0 (0%)       | 1 (0.2%) | 0 (0%)   | 0 (0%) |
| Hepatic cirrhosis                      | 0 (0%)      | 0 (0%)   | 0 (0%)   | 0 (0%)   | 0 (0%)       | 1 (0.2%) | 0 (0%)   | 0 (0%) |
| Hepatic infarction                     | 0 (0%)      | 0 (0%)   | 0 (0%)   | 0 (0%)   | 0 (0%)       | 1 (0.2%) | 0 (0%)   | 0 (0%) |
| Hepatic vein thrombosis                | 0 (0%)      | 0 (0%)   | 0 (0%)   | 0 (0%)   | 0 (0%)       | 1 (0.2%) | 0 (0%)   | 0 (0%) |
| Hepatitis C                            | 0 (0%)      | 0 (0%)   | 0 (0%)   | 0 (0%)   | 0 (0%)       | 1 (0.2%) | 0 (0%)   | 0 (0%) |
| Hernia pain                            | 0 (0%)      | 1 (0.2%) | 0 (0%)   | 0 (0%)   | 0 (0%)       | 0 (0%)   | 0 (0%)   | 0 (0%) |
| Hydrocele                              | 0 (0%)      | 0 (0%)   | 0 (0%)   | 0 (0%)   | 0 (0%)       | 1 (0.2%) | 0 (0%)   | 0 (0%) |



| Event Term                              | Chemo alone |          |          |          | Chemo + SIRT |          |          |        |
|-----------------------------------------|-------------|----------|----------|----------|--------------|----------|----------|--------|
|                                         | 1 and 2     | 3        | 4        | 5        | 1 and 2      | 3        | 4        | 5      |
| Hyperparathyroidism                     | 0 (0%)      | 1 (0.2%) | 0 (0%)   | 0 (0%)   | 0 (0%)       | 0 (0%)   | 0 (0%)   | 0 (0%) |
| Hypochloraemia                          | 0 (0%)      | 1 (0.2%) | 0 (0%)   | 0 (0%)   | 0 (0%)       | 0 (0%)   | 0 (0%)   | 0 (0%) |
| Hypovolaemic shock                      | 0 (0%)      | 0 (0%)   | 1 (0.2%) | 0 (0%)   | 0 (0%)       | 0 (0%)   | 0 (0%)   | 0 (0%) |
| Infusion site thrombosis                | 0 (0%)      | 1 (0.2%) | 0 (0%)   | 0 (0%)   | 0 (0%)       | 0 (0%)   | 0 (0%)   | 0 (0%) |
| Intestinal anastomosis complication     | 0 (0%)      | 1 (0.2%) | 0 (0%)   | 0 (0%)   | 0 (0%)       | 0 (0%)   | 0 (0%)   | 0 (0%) |
| Intestinal ischaemia                    | 0 (0%)      | 0 (0%)   | 0 (0%)   | 0 (0%)   | 0 (0%)       | 1 (0.2%) | 0 (0%)   | 0 (0%) |
| Ischaemia                               | 0 (0%)      | 0 (0%)   | 1 (0.2%) | 0 (0%)   | 0 (0%)       | 0 (0%)   | 0 (0%)   | 0 (0%) |
| Ischaemic stroke                        | 0 (0%)      | 0 (0%)   | 0 (0%)   | 0 (0%)   | 0 (0%)       | 1 (0.2%) | 0 (0%)   | 0 (0%) |
| Klebsiella sepsis                       | 0 (0%)      | 1 (0.2%) | 0 (0%)   | 0 (0%)   | 0 (0%)       | 0 (0%)   | 0 (0%)   | 0 (0%) |
| Large intestinal stenosis               | 0 (0%)      | 0 (0%)   | 0 (0%)   | 0 (0%)   | 0 (0%)       | 1 (0.2%) | 0 (0%)   | 0 (0%) |
| Lhermitte's sign                        | 0 (0%)      | 1 (0.2%) | 0 (0%)   | 0 (0%)   | 0 (0%)       | 0 (0%)   | 0 (0%)   | 0 (0%) |
| Lipase increased                        | 0 (0%)      | 0 (0%)   | 0 (0%)   | 0 (0%)   | 0 (0%)       | 1 (0.2%) | 0 (0%)   | 0 (0%) |
| Liver function tests abnormal           | 0 (0%)      | 0 (0%)   | 0 (0%)   | 0 (0%)   | 0 (0%)       | 1 (0.2%) | 0 (0%)   | 0 (0%) |
| Loss of consciousness                   | 0 (0%)      | 0 (0%)   | 1 (0.2%) | 0 (0%)   | 0 (0%)       | 0 (0%)   | 0 (0%)   | 0 (0%) |
| Lower respiratory tract infection viral | 0 (0%)      | 1 (0.2%) | 0 (0%)   | 0 (0%)   | 0 (0%)       | 0 (0%)   | 0 (0%)   | 0 (0%) |
| Lung abscess                            | 0 (0%)      | 0 (0%)   | 0 (0%)   | 1 (0.2%) | 0 (0%)       | 0 (0%)   | 0 (0%)   | 0 (0%) |
| Malignant ascites                       | 0 (0%)      | 0 (0%)   | 0 (0%)   | 0 (0%)   | 0 (0%)       | 1 (0.2%) | 0 (0%)   | 0 (0%) |
| Muscle haemorrhage                      | 0 (0%)      | 0 (0%)   | 0 (0%)   | 0 (0%)   | 0 (0%)       | 1 (0.2%) | 0 (0%)   | 0 (0%) |
| Neutropenic colitis                     | 0 (0%)      | 1 (0.2%) | 0 (0%)   | 0 (0%)   | 0 (0%)       | 0 (0%)   | 0 (0%)   | 0 (0%) |
| Neutropenic sepsis                      | 0 (0%)      | 0 (0%)   | 0 (0%)   | 0 (0%)   | 0 (0%)       | 0 (0%)   | 1 (0.2%) | 0 (0%) |
| Obstruction                             | 0 (0%)      | 0 (0%)   | 0 (0%)   | 0 (0%)   | 0 (0%)       | 0 (0%)   | 1 (0.2%) | 0 (0%) |
| Oedema mouth                            | 0 (0%)      | 1 (0.2%) | 0 (0%)   | 0 (0%)   | 0 (0%)       | 0 (0%)   | 0 (0%)   | 0 (0%) |
| Oesophageal stenosis                    | 0 (0%)      | 0 (0%)   | 0 (0%)   | 0 (0%)   | 0 (0%)       | 1 (0.2%) | 0 (0%)   | 0 (0%) |
| Oesophagitis haemorrhagic               | 0 (0%)      | 1 (0.2%) | 0 (0%)   | 0 (0%)   | 0 (0%)       | 0 (0%)   | 0 (0%)   | 0 (0%) |
| Orchitis                                | 0 (0%)      | 1 (0.2%) | 0 (0%)   | 0 (0%)   | 0 (0%)       | 0 (0%)   | 0 (0%)   | 0 (0%) |
| Parainfluenzae virus infection          | 0 (0%)      | 0 (0%)   | 0 (0%)   | 0 (0%)   | 0 (0%)       | 1 (0.2%) | 0 (0%)   | 0 (0%) |
| Pelvic abscess                          | 0 (0%)      | 1 (0.2%) | 0 (0%)   | 0 (0%)   | 0 (0%)       | 0 (0%)   | 0 (0%)   | 0 (0%) |
| Perihepatic abscess                     | 0 (0%)      | 0 (0%)   | 0 (0%)   | 0 (0%)   | 0 (0%)       | 1 (0.2%) | 0 (0%)   | 0 (0%) |
| Peripheral artery stenosis              | 0 (0%)      | 1 (0.2%) | 0 (0%)   | 0 (0%)   | 0 (0%)       | 0 (0%)   | 0 (0%)   | 0 (0%) |
| Peripheral embolism                     | 0 (0%)      | 1 (0.2%) | 0 (0%)   | 0 (0%)   | 0 (0%)       | 0 (0%)   | 0 (0%)   | 0 (0%) |
| Peroneal nerve palsy                    | 0 (0%)      | 1 (0.2%) | 0 (0%)   | 0 (0%)   | 0 (0%)       | 0 (0%)   | 0 (0%)   | 0 (0%) |
| Pneumonia fungal                        | 0 (0%)      | 0 (0%)   | 0 (0%)   | 0 (0%)   | 0 (0%)       | 1 (0.2%) | 0 (0%)   | 0 (0%) |
| Pneumonia klebsiella                    | 0 (0%)      | 1 (0.2%) | 0 (0%)   | 0 (0%)   | 0 (0%)       | 0 (0%)   | 0 (0%)   | 0 (0%) |
| Post procedural diarrhoea               | 0 (0%)      | 1 (0.2%) | 0 (0%)   | 0 (0%)   | 0 (0%)       | 0 (0%)   | 0 (0%)   | 0 (0%) |
| Pseudomonal bacteraemia                 | 0 (0%)      | 0 (0%)   | 0 (0%)   | 0 (0%)   | 0 (0%)       | 0 (0%)   | 1 (0.2%) | 0 (0%) |
| Pulmonary embolism                      | 0 (0%)      | 0 (0%)   | 1 (0.2%) | 0 (0%)   | 0 (0%)       | 0 (0%)   | 0 (0%)   | 0 (0%) |
| Pulmonary infarction                    | 0 (0%)      | 1 (0.2%) | 0 (0%)   | 0 (0%)   | 0 (0%)       | 0 (0%)   | 0 (0%)   | 0 (0%) |
| Pulmonary oedema                        | 0 (0%)      | 0 (0%)   | 0 (0%)   | 0 (0%)   | 0 (0%)       | 1 (0.2%) | 0 (0%)   | 0 (0%) |
| Pyelonephritis                          | 0 (0%)      | 1 (0.2%) | 0 (0%)   | 0 (0%)   | 0 (0%)       | 0 (0%)   | 0 (0%)   | 0 (0%) |
| Rectal abscess                          | 0 (0%)      | 0 (0%)   | 0 (0%)   | 0 (0%)   | 0 (0%)       | 1 (0.2%) | 0 (0%)   | 0 (0%) |
| Renal injury                            | 0 (0%)      | 0 (0%)   | 1 (0.2%) | 0 (0%)   | 0 (0%)       | 0 (0%)   | 0 (0%)   | 0 (0%) |
| Retinal detachment                      | 0 (0%)      | 1 (0.2%) | 0 (0%)   | 0 (0%)   | 0 (0%)       | 0 (0%)   | 0 (0%)   | 0 (0%) |
| Salmonellosis                           | 0 (0%)      | 1 (0.2%) | 0 (0%)   | 0 (0%)   | 0 (0%)       | 0 (0%)   | 0 (0%)   | 0 (0%) |
| Speech disorder                         | 0 (0%)      | 0 (0%)   | 0 (0%)   | 0 (0%)   | 0 (0%)       | 1 (0.2%) | 0 (0%)   | 0 (0%) |
| Splenic infarction                      | 0 (0%)      | 0 (0%)   | 1 (0.2%) | 0 (0%)   | 0 (0%)       | 0 (0%)   | 0 (0%)   | 0 (0%) |
| Staphylococcal bacteraemia              | 0 (0%)      | 1 (0.2%) | 0 (0%)   | 0 (0%)   | 0 (0%)       | 0 (0%)   | 0 (0%)   | 0 (0%) |
| Stress cardiomyopathy                   | 0 (0%)      | 0 (0%)   | 1 (0.2%) | 0 (0%)   | 0 (0%)       | 0 (0%)   | 0 (0%)   | 0 (0%) |
| Suicide attempt                         | 0 (0%)      | 0 (0%)   | 1 (0.2%) | 0 (0%)   | 0 (0%)       | 0 (0%)   | 0 (0%)   | 0 (0%) |

| Event Term                      | Chemo alone |          |        |        | Chemo + SIRT |          |        |        |
|---------------------------------|-------------|----------|--------|--------|--------------|----------|--------|--------|
|                                 | 1 and 2     | 3        | 4      | 5      | 1 and 2      | 3        | 4      | 5      |
| Supraventricular tachycardia    | 0 (0%)      | 1 (0.2%) | 0 (0%) | 0 (0%) | 0 (0%)       | 0 (0%)   | 0 (0%) | 0 (0%) |
| Surgery                         | 0 (0%)      | 0 (0%)   | 0 (0%) | 0 (0%) | 0 (0%)       | 1 (0.2%) | 0 (0%) | 0 (0%) |
| Thyroid cancer                  | 0 (0%)      | 0 (0%)   | 0 (0%) | 0 (0%) | 0 (0%)       | 1 (0.2%) | 0 (0%) | 0 (0%) |
| Troponin increased              | 0 (0%)      | 0 (0%)   | 0 (0%) | 0 (0%) | 0 (0%)       | 1 (0.2%) | 0 (0%) | 0 (0%) |
| Upper limb fracture             | 0 (0%)      | 1 (0.2%) | 0 (0%) | 0 (0%) | 0 (0%)       | 0 (0%)   | 0 (0%) | 0 (0%) |
| Urinary tract obstruction       | 0 (0%)      | 0 (0%)   | 0 (0%) | 0 (0%) | 0 (0%)       | 1 (0.2%) | 0 (0%) | 0 (0%) |
| Urine output decreased          | 0 (0%)      | 0 (0%)   | 0 (0%) | 0 (0%) | 0 (0%)       | 1 (0.2%) | 0 (0%) | 0 (0%) |
| Vessel puncture site thrombosis | 0 (0%)      | 1 (0.2%) | 0 (0%) | 0 (0%) | 0 (0%)       | 0 (0%)   | 0 (0%) | 0 (0%) |
| Volvulus of small bowel         | 0 (0%)      | 1 (0.2%) | 0 (0%) | 0 (0%) | 0 (0%)       | 0 (0%)   | 0 (0%) | 0 (0%) |
| Wound evisceration              | 0 (0%)      | 1 (0.2%) | 0 (0%) | 0 (0%) | 0 (0%)       | 0 (0%)   | 0 (0%) | 0 (0%) |

<sup>1</sup> All grade 1-2 occurring in at least 10% of patients and all grades 3,4,5

**Table S10: Grade 5 AEs in the as-treated population during the main safety window <sup>1</sup>**

| System organ class                                      | Event Term                            | Chemotherapy (n=571) | Chemotherapy + SIRT (n=507) |
|---------------------------------------------------------|---------------------------------------|----------------------|-----------------------------|
| Number of patients experiencing a grade 5 adverse event |                                       | 11                   | 10                          |
| Number of grade 5 adverse events <sup>2</sup>           |                                       | 12                   | 12                          |
| Blood and lymphatic system disorders                    | Febrile neutropenia                   | 0                    | 1                           |
|                                                         | Neutropenia                           | 1                    | 0                           |
| Cardiac disorders                                       | Acute myocardial infarction           | 1                    | 0                           |
|                                                         | Cardiac arrest                        | 1                    | 0                           |
| Gastrointestinal disorders                              | Intestinal perforation                | 0                    | 1                           |
|                                                         | Large intestine perforation           | 1                    | 0                           |
| General disorders and administration site conditions    | General physical health deterioration | 0                    | 1                           |
| Hepatobiliary disorders                                 | Hepatic failure                       | 0                    | 1                           |
|                                                         | Portal vein thrombosis                | 0                    | 1                           |
| Infections and infestations                             | Escherichia sepsis                    | 1                    | 0                           |
|                                                         | Lung abscess                          | 1                    | 0                           |
|                                                         | Neutropenic sepsis                    | 1                    | 0                           |
|                                                         | Peritonitis                           | 0                    | 1                           |
|                                                         | Pneumonia                             | 0                    | 1                           |
|                                                         | Respiratory tract infection           | 1                    | 0                           |
| Injury, poisoning and procedural complications          | Radiation hepatitis                   | 0                    | 2                           |
|                                                         | Toxicity to various agents            | 1                    | 0                           |
| Metabolism and nutrition disorders                      | Diabetic complication                 | 1                    | 0                           |
| Nervous system disorders                                | Cerebral haemorrhage                  | 1                    | 0                           |
| Respiratory, thoracic and mediastinal disorders         | Chronic obstructive pulmonary disease | 0                    | 1                           |
|                                                         | Dyspnoea                              | 0                    | 1                           |
|                                                         | Pneumonia aspiration                  | 1                    | 0                           |
|                                                         | Respiratory failure                   | 0                    | 1                           |

<sup>1</sup> Adverse events up to 28 days after stopping protocol chemotherapy or seven months whichever was sooner

<sup>2</sup> Three patients had two grade 5 adverse event terms recorded in the database. One on the chemotherapy arm and two on the chemotherapy + SIRT arm.

**Table S11: Summary of patients experiencing at least one SAE and its relatedness to treatment**

|                                       |     | Combined, safety population |                             |                  |
|---------------------------------------|-----|-----------------------------|-----------------------------|------------------|
|                                       |     | Chemotherapy (n=571)        | Chemotherapy + SIRT (n=507) | Overall (n=1078) |
| Had at least one SAE                  | Yes | 244 (42.7%)                 | 274 (54.0%)                 | 518 (48.1%)      |
|                                       | No  | 327 (57.3%)                 | 233 (46.0%)                 | 560 (51.9%)      |
| Had at least one SAE related to Chemo | Yes | 141 (24.7%)                 | 165 (32.5%)                 | 306 (28.4%)      |
|                                       | No  | 430 (75.3%)                 | 342 (67.5%)                 | 772 (71.6%)      |
| Had at least one SAE related to SIRT  | Yes | 1 (0.2%)                    | 83 (16.4%)                  | 84 (7.8%)        |
|                                       | No  | 570 (99.8%)                 | 424 (83.6%)                 | 994 (92.2%)      |

**Table S12. Cause of death by treatment group (n=844)**

|                |                              | Chemo alone (n=411) | Chemo + SIRT (n=433) | Overall (n=844) |
|----------------|------------------------------|---------------------|----------------------|-----------------|
| Cause of Death | Progressive disease/CRC      | 290 (70.6%)         | 304 (70.2%)          | 594 (70.4%)     |
|                | Cancer (unspecified) related | 7 (1.7%)            | 11 (2.5%)            | 18 (2.1%)       |
|                | Other disease related        | 10 (2.4%)           | 8 (1.8%)             | 18 (2.1%)       |
|                | Organ failure                | 12 (2.9%)           | 12 (2.8%)            | 24 (2.8%)       |
|                | Treatment related            | 3 (0.7%)            | 8 (1.8%)             | 11 (1.3%)       |
|                | Other                        | 24 (5.8%)           | 32 (7.4%)            | 56 (6.6%)       |
|                | Unknown                      | 65 (15.8%)          | 58 (13.4%)           | 123 (14.6%)     |

**Table S13: HRQoL summaries: mean EQ-5D utility values at baseline and follow-up points, combined FOXFIRE, SIRFLOX and FOXFIRE-Global trials, using US utility tariff**

|            | Chemo +SIRT | Chemo alone | Difference (base-line adjusted) | Lower /Upper CI | p-value | FOXFIRE (Responses, total alive, percentage) |               | FOXFIRE Global (Responses, total alive, percentage) |               | SIRFLOX (Responses, total alive, percentage) |               | POOLED (Responses, total alive, percentage) |               |
|------------|-------------|-------------|---------------------------------|-----------------|---------|----------------------------------------------|---------------|-----------------------------------------------------|---------------|----------------------------------------------|---------------|---------------------------------------------|---------------|
|            |             |             |                                 |                 |         | Sirt                                         | No Sirt       | Sirt                                                | No Sirt       | Sirt                                         | No Sirt       | Sirt                                        | No Sirt       |
| Base-line  | 0.837       | 0.840       |                                 |                 |         | 159/182 (87%)                                | 162/182 (89%) | 103/105 (98%)                                       | 102/104 (98%) | 248/267 (93%)                                | 243/263 (92%) | 510/554 (92%)                               | 507/549 (92%) |
| 2-3 months | 0.828       | 0.846       | -0.021                          | -0.040/-0.001   | 0.038   | 136/176 (77%)                                | 137/178 (77%) | 80/100 (80%)                                        | 85/99 (86%)   | 215/260 (83%)                                | 195/259 (75%) | 431/536 (80%)                               | 417/536 (78%) |
| 6 months   | 0.823       | 0.836       | -0.019                          | -0.045/0.007    | 0.144   | 13/162 (8%)                                  | 11/171 (6%)   | 78/97 (80%)                                         | 74/94 (79%)   | 169/243 (70%)                                | 162/252 (64%) | 260/502 (52%)                               | 247/517 (48%) |
| 12 months  | 0.831       | 0.841       | -0.023                          | -0.050/0.004    | 0.096   | 84/132 (64%)                                 | 73/141 (52%)  | 57/85 (67%)                                         | 53/85 (62%)   | 112/213 (53%)                                | 89/222 (40%)  | 253/430 (59%)                               | 215/448 (48%) |
| 24 months  | 0.810       | 0.814       | -0.013                          | -0.069/0.044    | 0.664   | 41/73 (56%)                                  | 37/80 (46%)   | 12/62 (19%)                                         | 16/59 (27%)   | 32/135 (24%)                                 | 21/146 (14%)  | 85/270 (31%)                                | 74/285 (26%)  |

\* Completion rate = number of valid responses as a percentage of total known to be alive

**Table S14: List of sites, principal investigators and number of patients recruited**

| number of PTs | Study             | Principal Investigator                                              | Hospital Name                                                                   | City           | Country     |
|---------------|-------------------|---------------------------------------------------------------------|---------------------------------------------------------------------------------|----------------|-------------|
| 44            | FOXFIRE           | Prof Ricky Sharma/Dr Andrew Weaver                                  | Churchill Hospital                                                              | Oxford         | UK          |
| 41            | FOXFIRE           | Dr Harpreet Wasan                                                   | (Imperial College Healthcare NHS Trust)                                         | London         | UK          |
| 36            | SIRFLOX           | Dr. Peter Gibbs                                                     | Sunshine Hospital                                                               | St Albans      | Australia   |
| 30            | SIRFLOX           | Dr. Chris Jackson<br>Prof. David Perez (from 7Mar08 to 8Jan16)      | Dunedin Hospital                                                                | Dunedin        | New Zealand |
| 29            | FOXFIRE           | Dr Jamie Mills                                                      | Nottingham City Hospital                                                        | Nottingham     | UK          |
| 28            | SIRFLOX           | Prof. Michael Findlay                                               | Auckland Hospital                                                               | Auckland       | New Zealand |
| 28            | FOXFIRE           | Dr Charles Wilson                                                   | Addenbrookes Hospital                                                           | Cambridge      | UK          |
| 27            | SIRFLOX           | Dr. Guy Van Hazel                                                   | Mount Medical Center                                                            | Perth          | Australia   |
| 26            | FOXFIRE           | Dr Richard Adams                                                    | Velindre Hospital                                                               | Cardiff        | UK          |
| 23            | FOXFIRE           | Dr Amir Montazeri                                                   | Royal Liverpool University Hospital                                             | Liverpool      | UK          |
| 23            | FOXFIRE           | Dr Daniel Swinson                                                   | St James's University Hospital                                                  | Leeds          | UK          |
| 20            | SIRFLOX           | Prof. Bridget Robinson                                              | Christchurch Hospital                                                           | Christchurch   | New Zealand |
| 20            | SIRFLOX           | Dr. Andrew Strickland                                               | Monash Medical Centre                                                           | Bentleigh East | Australia   |
| 20            | FOXFIRE           | Dr Ewan Brown                                                       | Western General Hospital                                                        | Edinburgh      | UK          |
| 20            | FOXFIRE           | Dr Maher Hadaki:<br>28May2012<br>Dr Harpreet Wasan:<br>27Feb2015    | Wexham Park Hospital                                                            | Slough         | UK          |
| 18            | SIRFLOX           | Prof. Guy Van Hazel                                                 | Sir Charles Gairdner Hospital                                                   | Nedlands       | Australia   |
| 18            | FOXFIRE           | Dr Greg Wilson                                                      | Christie Hospital                                                               | Manchester     | UK          |
| 15            | SIRFLOX           | Prof. Jens Ricke                                                    | Universitaetsklinikum Magdeburg,<br>Klinik für Radiologie und<br>Nuklearmedizin | Magdeburg      | Germany     |
| 14            | SIRFLOX           | Dr. Thomas Ferguson<br>Dr. David Ransom (from 12Dec07 to 21Dec11)   | Fiona Stanley Hospital                                                          | Murdoch        | Australia   |
| 13            | SIRFLOX           | Dr. Hendrik Kröning                                                 | Schwerpunktpraxis für Hämatologie<br>und Onkologie                              | Magdeburg      | Germany     |
| 13            | SIRFLOX           | Dr. Javier Rodriguez                                                | Clinica Universitaria de Navarra                                                | Pamplona       | Spain       |
| 13            | FOXFIRE           | Dr Rebecca Muirhead:<br>14Dec2012<br>Dr Sarah Lowndes:<br>31Jul2015 | Great Western Hospital                                                          | Swindon        | UK          |
| 12            | FOXFIRE<br>Global | Dr. Marc Pracht<br>Dr. Eveline Boucher (from 3Dec13 to 24Feb15)     | Centre Eugène Marquis                                                           | Rennes cedex   | France      |
| 11            | SIRFLOX           | Prof. Adi Shani<br>Dr. Ido Wolf (until 17Apr12)                     | Sheba Medical Center                                                            | Tel-Hashomer   | Israel      |
| 11            | FOXFIRE           | Dr Paul Ross                                                        | Kings Health Partnership (Guys)                                                 | London         | UK          |

| number of PTs | Study          | Principal Investigator                                                                                                                                                                                        | Hospital Name                                                  | City             | Country     |
|---------------|----------------|---------------------------------------------------------------------------------------------------------------------------------------------------------------------------------------------------------------|----------------------------------------------------------------|------------------|-------------|
| 11            | FOXFIRE        | Dr Joanne Hornbuckle                                                                                                                                                                                          | Weston Park Hospital                                           | Sheffield        | UK          |
| 10            | SIRFLOX        | Dr. Vinod Ganju                                                                                                                                                                                               | Peninsula and South Eastern Haematology and Oncology Group     | Frankston        | Australia   |
| 10            | SIRFLOX        | Dr. Euan Walpole                                                                                                                                                                                              | Princess Alexandra Hospital                                    | Woolloongabba    | Australia   |
| 10            | SIRFLOX        | Dr. Marc Pracht<br>Dr. Evelyn Boucher (until 27Feb2015)                                                                                                                                                       | Comprehensive Cancer Centre Eugène Marquis                     | Rennes           | France      |
| 10            | FOXFIRE Global | Prof. Guy Van Hazel                                                                                                                                                                                           | Sir Charles Gairdner Hospital                                  | Nedlands         | Australia   |
| 9             | SIRFLOX        | Dr. Adeel Kaiser<br>Dr. Michael Chuong (from 6May15 to 28Jun15)<br>Dr. Pradip Amin (from 24Jul09 to 22Nov11)<br>Dr. Micheal Garofalo (from 20Mar08 to 24Sep09)<br>Dr. Navesh Sharma (from 22Nov11 to 06May15) | University of Maryland Medical Center                          | Baltimore        | USA         |
| 9             | SIRFLOX        | Dr. Ravit Geva<br>Dr. Einat Shacham-Shmueli (until 01Aug12)                                                                                                                                                   | TA Sourasky Medical Center                                     | Tel Aviv         | Israel      |
| 9             | SIRFLOX        | Dr. Norman Isaac Heching<br>Dr. Thomas Tichler (until 28Feb14)                                                                                                                                                | Shaare-Zedek Medical Center                                    | Jerusalem        | Israel      |
| 8             | SIRFLOX        | Dr. Richard Isaacs                                                                                                                                                                                            | Palmerston North Hospital                                      | Palmerston North | New Zealand |
| 8             | SIRFLOX        | Dr. Alex Powell/Dr. Joe Cardaci                                                                                                                                                                               | Hollywood Private Hospital                                     | Nedlands         | Australia   |
| 8             | FOXFIRE Global | Dr. Madhu Singh                                                                                                                                                                                               | Barwon Health                                                  | Geelong          | Australia   |
| 8             | FOXFIRE Global | Dr. Ana Ruiz Casado                                                                                                                                                                                           | Hospital Universitario Puerta de Hierro Majadahonda            | Madrid           | Spain       |
| 8             | FOXFIRE        | Dr Andrew Bateman                                                                                                                                                                                             | Southampton General Hospital                                   | Southampton      | UK          |
| 7             | SIRFLOX        | Dr. Paul Eliadis                                                                                                                                                                                              | Wesley Medical Centre                                          | Milton           | Australia   |
| 7             | SIRFLOX        | Dr. Eric Wang/Dr. Seungjean Chai<br>Dr. Frenette (until 30Jun16)<br>Dr. Steven Limentani (from 08Apr11 to 17Jul15)                                                                                            | Carolinas Health System                                        | Charlotte        | USA         |
| 7             | SIRFLOX        | Dr. Yi Jen Chen<br>Dr. Stephen Shibata (until 22Apr12)                                                                                                                                                        | City of Hope                                                   | Duarte           | USA         |
| 7             | SIRFLOX        | Dr. Els Monsaert                                                                                                                                                                                              | AZ Maria Middelaers                                            | Gent             | Belgium     |
| 7             | FOXFIRE Global | Dr. Peter Gibbs                                                                                                                                                                                               | Sunshine Hospital                                              | St Albans        | Australia   |
| 7             | FOXFIRE        | Dr Andrew Weaver                                                                                                                                                                                              | <b>Buckinghamshire Healthcare NHS Trust</b>                    | Buckinghamshire  | UK          |
| 6             | SIRFLOX        | Prof. Yon-Dschun Ko                                                                                                                                                                                           | Johanniterkrankenhaus Bonn                                     | Bonn             | Germany     |
| 6             | SIRFLOX        | Dr. Stefan Pluntke                                                                                                                                                                                            | Kliniken Essen Mitte, Evang. Huysens-Stiftung/Knappschaft GmbH | Essen            | Germany     |
| 6             | SIRFLOX        | Dr. Marc Polus                                                                                                                                                                                                | C.H.U. Sart-Tilman                                             | Liège            | Belgium     |
| 6             | SIRFLOX        | Prof. Julien Taieb                                                                                                                                                                                            | Hôpital Européen Georges Pompidou (HEGP)                       | Paris            | France      |
| 6             | FOXFIRE Global | Dr. Anne O'Donnell                                                                                                                                                                                            | Wellington Hospital                                            | Wellington       | New Zealand |
| 6             | FOXFIRE Global | Dr. Morteza Aghmesheh                                                                                                                                                                                         | Southern Medical Day Care Centre                               | Wollongong       | Australia   |
| 6             | FOXFIRE Global | Dr. Kynan Feeney                                                                                                                                                                                              | St John of God Murdoch Hospital                                | Murdoch          | Australia   |
| 6             | FOXFIRE Global | Dr. Jin Tung Liang                                                                                                                                                                                            | National Taiwan University Hospital                            | Taipei           | Taiwan      |

| number of PTs | Study          | Principal Investigator                                           | Hospital Name                                                    | City              | Country     |
|---------------|----------------|------------------------------------------------------------------|------------------------------------------------------------------|-------------------|-------------|
| 6             | FOXFIRE        | Dr Rubin Soomal: 29-Aug2011<br>Dr Liz Sherwin: 23Sep2015         | Ipswich Hospital                                                 | Ipswich           | UK          |
| 5             | SIRFLOX        | Dr. Nick Pavlakis                                                | Royal North Shore Hospital                                       | St Leonards       | Australia   |
| 5             | SIRFLOX        | Dr. Nimit Singhal<br>Dr. Michael Brown (from 21Jan08 to 15Aug10) | Royal Adelaide Hospital                                          | Adelaide          | Australia   |
| 5             | SIRFLOX        | Dr. Robert Martin                                                | University of Louisville Hospital                                | Louisville        | USA         |
| 5             | SIRFLOX        | Dr. Andreas Kaubisch                                             | Montefiore Medical Center                                        | Bronx, NY         | USA         |
| 5             | SIRFLOX        | Dr. Matthew Holtzman                                             | University of Pittsburgh Medical Center                          | Pittsburgh        | USA         |
| 5             | SIRFLOX        | Prof. Dr. med. Hanno Riess                                       | CharitéCentrum 14 für Tumormedizin - Med. Klinik mit Schwerpunkt | Berlin            | Germany     |
| 5             | SIRFLOX        | Dr. Denis Smith/Dr. Eric Terrebonne                              | CHU de Bordeaux                                                  | Bordeaux/Pessac   | France      |
| 5             | FOXFIRE Global | Dr. Vinod Ganju                                                  | Peninsula and South Eastern Haematology and Oncology Group       | Frankston         | Australia   |
| 5             | FOXFIRE Global | Dr. Lionel Lim                                                   | Maroondah Hospital                                               | Ringwood East     | Australia   |
| 5             | FOXFIRE Global | Dr. Prasad Cooray                                                | Box Hill Hospital                                                | Box Hill          | Australia   |
| 5             | FOXFIRE Global | Dr. Marco Matos                                                  | Gold Coast University Hospital                                   | Southport         | Australia   |
| 5             | FOXFIRE Global | Dr. Aurélie Ferru                                                | CHU de Poitiers, Pôle régional de cancérologie                   | Poitiers          | France      |
| 5             | FOXFIRE Global | Dr. Ravit Geva                                                   | TA Sourasky Medical Center                                       | Tel Aviv          | Israel      |
| 5             | FOXFIRE Global | Dr. Hubert Ayala                                                 | Hadassah Medical Center                                          | Jerusalem         | Israel      |
| 5             | FOXFIRE        | Dr Colin Purcell                                                 | Belfast City Hospital                                            | Belfast           | UK          |
| 5             | FOXFIRE        | Dr Axel Walther                                                  | Bristol Haematology & Oncology Centre                            | Bristol           | UK          |
| 5             | FOXFIRE        | Mr Matthew Metcalfe                                              | Leicester Royal Infirmary                                        | Leicester         | UK          |
| 5             | FOXFIRE        | Dr Andreas Polychronis                                           | Lister Hospital                                                  | Stevenage         | UK          |
| 5             | FOXFIRE        | Dr Fiona Lofts                                                   | St Georges Hospital                                              | London            | UK          |
| 4             | SIRFLOX        | Dr. Jenny Shannon                                                | Nepean Hospital Nepean Cancer Care Centre                        | Kingswood         | Australia   |
| 4             | SIRFLOX        | Prof. Eva Segelov                                                | St Vincent's Hospital                                            | Darlinghurst      | Australia   |
| 4             | SIRFLOX        | Dr. Philip James                                                 | Maroondah Hospital                                               | Ringwood East     | Australia   |
| 4             | SIRFLOX        | Dr. Marco Matos                                                  | Gold Coast University Hospital                                   | Southport         | Australia   |
| 4             | SIRFLOX        | Dr. Seza Gulec                                                   | Florida International University                                 | North Miami Beach | USA         |
| 4             | SIRFLOX        | Dr. Ursula Vehling-Kaiser                                        | Internistische Gemeinschaftspraxis                               | Landshut Altstadt | Germany     |
| 4             | SIRFLOX        | Prof. Dr. Volker Heinemann                                       | Klinikum der Universitaet Muenchen, Klinikum Großhadern          | Muenchen          | Germany     |
| 4             | SIRFLOX        | Prof. Klaus Tatsch                                               | Klinikum Karlsruhe, Städtisches Klinikum Karlsruhe gGmbH         | Karlsruhe         | Germany     |
| 4             | SIRFLOX        | Prof. Karen Geboes                                               | Universiteit Ziekenhuis Gent                                     | Gent              | Belgium     |
| 4             | SIRFLOX        | Dr. Ruth Vera Garcia                                             | Hospital de Navarra                                              | Pamplona          | Spain       |
| 4             | SIRFLOX        | Dr. Alex Beny                                                    | Rambam Health Care Campus                                        | Haifa             | Israel      |
| 4             | FOXFIRE Global | Prof. Michael Findlay                                            | Auckland University                                              | Auckland          | New Zealand |
| 4             | FOXFIRE Global | Dr. Mathew Burge                                                 | Royal Brisbane and Women's Hospital                              | Herston           | Australia   |

| number of PTs | Study          | Principal Investigator                                                                                               | Hospital Name                                                     | City              | Country     |
|---------------|----------------|----------------------------------------------------------------------------------------------------------------------|-------------------------------------------------------------------|-------------------|-------------|
| 4             | FOXFIRE Global | Dr. Tom Ferguson                                                                                                     | Royal Perth Hospital                                              | Murdoch           | Australia   |
| 4             | FOXFIRE Global | Dr. Norman Isaac Heching<br>Dr. Thomas Tichler (until 28Feb14)                                                       | Shaare-Zedek Medical Center                                       | Jerusalem         | Israel      |
| 4             | FOXFIRE Global | Kyran Dowling, MD<br>Charles Bowers, MD (until 26Oct15)                                                              | Spartanburg Regional Healthcare                                   | Spartanburg       | USA         |
| 4             | FOXFIRE        | Dr Ian Chau                                                                                                          | <b>Royal Marsden NHS foundation trust</b>                         | London            | UK          |
| 3             | SIRFLOX        | Dr. Peter Gibbs                                                                                                      | Royal Melbourne Hospital                                          | Melbourne         | Australia   |
| 3             | SIRFLOX        | Prof. Timothy Price                                                                                                  | Queen Elizabeth Hospital                                          | Woodville South   | Australia   |
| 3             | SIRFLOX        | Dr. Federico Sanchez<br>Dr. Jacob Frick (from 11Jul11 to 12Jan15)<br>Dr. Daniel Bloomgarden (from 11Jul11 to 1Jul14) | Aurora Advanced Healthcare                                        | Wauwatosa         | USA         |
| 3             | SIRFLOX        | Dr. James Carlisle                                                                                                   | St. Marks Hospital                                                | Salt Lake City    | USA         |
| 3             | SIRFLOX        | Dr. med. Jorge Ramon Urrico Riera Knorrenschild                                                                      | Universitätsklinikum Gießen und Marburg GmbH                      | Marburg           | Germany     |
| 3             | SIRFLOX        | Prof. Frank Lammert                                                                                                  | Universitätsklinikum des Saarlandes                               | Homburg/Saar      | Germany     |
| 3             | SIRFLOX        | Dr. Karsten Ridwelski                                                                                                | Klinikum Magdeburg gGmbH                                          | Magdeburg         | Germany     |
| 3             | SIRFLOX        | Prof. Tilmann Sauerbruch                                                                                             | Universitätsklinik Bonn, Medizinische Klinik und Poliklinik I     | Bonn              | Germany     |
| 3             | SIRFLOX        | Prof. Thomas Vogl                                                                                                    | Klinikum der Johann Wolfgang Goethe-Universität Frankfurt am Main | Frankfurt am Main | Germany     |
| 3             | SIRFLOX        | Dr. Amélie Deleporte<br>Prof. Alain Hendlisz (from 1Feb12 to 2May12)                                                 | Institut Jules Bordet                                             | Brussels          | Belgium     |
| 3             | SIRFLOX        | Prof. Mark Peeters                                                                                                   | UZ Antwerpen                                                      | Edegem            | Belgium     |
| 3             | SIRFLOX        | Prof. Jacques Balosso<br>Dr. Christine Rebischung (until 16Aug 14)                                                   | Centre Hospitalier Universitaire de Grenoble C.H.U                | La Tronche        | France      |
| 3             | SIRFLOX        | Dr. Samy Louafi                                                                                                      | Centre Hospitalier General de Longjumeau                          | Longjumeau        | France      |
| 3             | SIRFLOX        | Dr. Salomon Stemmer                                                                                                  | Beilinson Hospital                                                | Petak Tikva       | Israel      |
| 3             | FOXFIRE Global | Dr. Chris Jackson                                                                                                    | Dunedin Hospital                                                  | Dunedin           | New Zealand |
| 3             | FOXFIRE Global | Dr. Louise Nott                                                                                                      | Royal Hobart Hospital                                             | Hobart            | Australia   |
| 3             | FOXFIRE Global | Dr. Andrew Strickland                                                                                                | Monash Medical Centre                                             | Bentleigh East    | Australia   |
| 3             | FOXFIRE Global | Dr. Craig Underhill                                                                                                  | Border Medical Oncology Research Unit                             | Albury            | Australia   |
| 3             | FOXFIRE Global | Dr. Hendrik Kröning                                                                                                  | Schwerpunktpraxis für Hämatologie und Onkologie                   | Magdeburg         | Germany     |
| 3             | FOXFIRE Global | Dr. Els Monsaert                                                                                                     | AZ Maria Middelaers                                               | Gent              | Belgium     |
| 3             | FOXFIRE Global | Prof Julien Taieb                                                                                                    | Hôpital Européen Georges Pompidou (HEGP)                          | Paris             | France      |
| 3             | FOXFIRE Global | Dr. Samy Louafi                                                                                                      | Centre Hospitalier General de Longjumeau                          | Longjumeau        | France      |
| 3             | FOXFIRE Global | Dr. Gianluca Masi                                                                                                    | Ospedale Santa Chiara                                             | Pisa              | Italy       |
| 3             | FOXFIRE Global | James Bui, MD                                                                                                        | University of Illinois at Chicago                                 | Chicago           | USA         |
| 3             | FOXFIRE Global | Francis Facchini, MD                                                                                                 | Adventist Hinsdale Hospital                                       | Hinsdale          | USA         |

| number of PTs | Study          | Principal Investigator                                                 | Hospital Name                                                                         | City            | Country     |
|---------------|----------------|------------------------------------------------------------------------|---------------------------------------------------------------------------------------|-----------------|-------------|
| 3             | FOXFIRE Global | Prof. HAN Sae Won                                                      | Seoul National University Hospital                                                    | Seoul           | Korea       |
| 3             | FOXFIRE        | Dr Astrid Mayer                                                        | Royal Free Hospital London                                                            | London          | UK          |
| 2             | SIRFLOX        | Dr. Anne O'Donnell                                                     | Wellington Hospital                                                                   | Wellington      | New Zealand |
| 2             | SIRFLOX        | Dr. Winston Liauw                                                      | St George Hospital                                                                    | Kogarah         | Australia   |
| 2             | SIRFLOX        | Dr. Gavin Marx                                                         | Sydney Adventist Hospital                                                             | Wahroonga       | Australia   |
| 2             | SIRFLOX        | Dr. Louise Nott                                                        | Royal Hobart Hospital                                                                 | Hobart          | Australia   |
| 2             | SIRFLOX        | Dr. Randall Smith/Dr. Grant Seeger                                     | Altru Health Systems                                                                  | Grand Forks     | USA         |
| 2             | SIRFLOX        | Dr. Francis Facchini/Dr. James Hannigan/Dr. Elyse Schneiderman         | Adventist Midwest Health/Hinsdale Hospital                                            | Hinsdale        | USA         |
| 2             | SIRFLOX        | Dr. Michael Gordon                                                     | Pinnacle Hematology Oncology                                                          | Scottsdale      | USA         |
| 2             | SIRFLOX        | Dr. James Bui/Dr. Howard Ozer                                          | University of Illinois at Chicago                                                     | Chicago         | USA         |
| 2             | SIRFLOX        | Dr. Bruna Angelelli<br>Dr. Andrea Martoni (until 01 Sept 2012)         | Ospedale Sant'Orsola-Malpighi                                                         | Bologna         | Italy       |
| 2             | SIRFLOX        | Dr. Oliver J. Stötzer                                                  | Hämato-onkologische Gemeinschaftspraxis und Tagesklinik                               | München         | Germany     |
| 2             | SIRFLOX        | Dr. Klemens Scheidhauer                                                | Klinikum rechts der Isar der TU München, Nuklearmedizinische Klinik u. Poliklinik,    | München         | Germany     |
| 2             | SIRFLOX        | Prof. Thomas Helmberger                                                | Klinikum Bogenhausen, Städtisches Klinikum München GmbH                               | Muenchen        | Germany     |
| 2             | FOXFIRE Global | Dr. Nimit Singhal                                                      | Royal Adelaide Hospital                                                               | Adelaide        | Australia   |
| 2             | FOXFIRE Global | Prof. Maike De Wit                                                     | Vivantes Klinikum Neukölln<br>Klinik für Innere Medizin-<br>Hämatologie und Onkologie | Berlin          | Germany     |
| 2             | FOXFIRE Global | Dr. Koenraad Hendrickx<br>Dr. Marc De Man (from 25Jul13 to 31 Dec13)   | OL Vrouw Ziekenhuis                                                                   | Aalst           | Belgium     |
| 2             | FOXFIRE Global | Prof. Alain Hendlitz<br>Dr. Amelie Deleporte (from 10Sep13 to 31Jan15) | Institut Jules Bordet                                                                 | Brussels        | Belgium     |
| 2             | FOXFIRE Global | Dr. Denis Smith and Dr. Eric Terrebonne                                | CHU de Bordeaux (Hôpital Saint Andre & Hôpital du Haut-Levêque)                       | Bordeaux/Pessac | France      |
| 2             | FOXFIRE Global | Prof. Adi Shani                                                        | Sheba Medical Center - Governmental Hospital                                          | Tel Hashomer    | Israel      |
| 2             | FOXFIRE Global | Dr. Cristina Granetto                                                  | Ospedale Santa Croce e Carle di Cuneo                                                 | Confreria (CN)  | Italy       |
| 2             | FOXFIRE Global | Dr. Bruna Angelelli                                                    | Policlinico Sant'Orsola Malpighi                                                      | Bologna         | Italy       |
| 2             | FOXFIRE Global | Dr. Antonio Trogu<br>Dr. Gianmauro Numico (08Oct13 to 11Aug15)         | Azienda USL della Valle d'Aosta                                                       | Aosta           | Italy       |
| 2             | FOXFIRE Global | Dr. Ruth Vera Garcia                                                   | Complejo Hospitalario de Navarra                                                      | Pamplona        | Spain       |
| 2             | FOXFIRE Global | Dr. Rosa Maria Fragoso                                                 | Instituto Português de Oncologia do Porto Francisco Gentil, E.P.E. (IPO Porto)        | Porto           | Portugal    |
| 2             | FOXFIRE Global | James Carlisle, MD                                                     | St. Mark's Hospital                                                                   | Salt Lake City  | USA         |
| 2             | FOXFIRE Global | Andreas Kaubisch, MD                                                   | Montefiore Medical Center                                                             | Bronx           | USA         |



| number of PTs | Study          | Principal Investigator                                                                                   | Hospital Name                                        | City             | Country     |
|---------------|----------------|----------------------------------------------------------------------------------------------------------|------------------------------------------------------|------------------|-------------|
| 2             | FOXFIRE Global | Matthew Holtzman, MD                                                                                     | University of Pittsburgh Medical Center              | Pittsburgh       | USA         |
| 2             | FOXFIRE Global | Prof. KIM Yeul Hong                                                                                      | Korea University Anam Hospital                       | Seoul            | Korea       |
| 2             | FOXFIRE        | Dr Tamas Hickish                                                                                         | Royal Bournemouth                                    | Bournemouth      | UK          |
| 2             | FOXFIRE        | Dr Sebastian Cummins                                                                                     | Royal Surrey County Hospital                         | Guildford        | UK          |
| 1             | SIRFLOX        | Dr. Matthew Burge                                                                                        | Royal Brisbane & Women's Hospital                    | Herston          | Australia   |
| 1             | SIRFLOX        | Dr. Chris Karapetis                                                                                      | Flinders Medical Center                              | Bedford Park     | Australia   |
| 1             | SIRFLOX        | Prof. Timothy Price                                                                                      | Lyell McEwin Hospital                                | Elizabeth Vale   | Australia   |
| 1             | SIRFLOX        | Dr. William Rilling/Dr. Benjamin George                                                                  | Medical College of Wisconsin - Froedtert Hospital    | Milwaukee        | USA         |
| 1             | SIRFLOX        | Dr. Andrew Coveler<br>Dr. Siddarth Padia (until 08Aug14)<br>Dr. Samuel Whiting (from 10Nov11 to 03May12) | University of Washington                             | Seattle          | USA         |
| 1             | SIRFLOX        | Dr. Michael Savin/Dr. Jeffrey Margolis                                                                   | William Beaumont Hospital                            | Royal oak        | USA         |
| 1             | SIRFLOX        | Dr. med. Arnd Nusch                                                                                      | Praxis für Hämatologie und Internistische Onkologie  | Velbert          | Germany     |
| 1             | SIRFLOX        | Prof. Dr. med. Harald-Robert Bruch                                                                       | Praxiskooperation Bonn, Fachärzte für Innere Medizin | Bonn             | Germany     |
| 1             | SIRFLOX        | Dr. Gerald Gehbauer                                                                                      | Onkologische Praxis Dr. Gerald Gehbauer              | Ingolstadt       | Germany     |
| 1             | SIRFLOX        | Dr. Koen Hendrickx<br>Dr. Marc De Man (from 23Jun11 to 31Dec13)                                          | Onze Lieve Vrouw Kiekenhuis                          | Aalst            | Belgium     |
| 1             | SIRFLOX        | Dr. Thierry Delaunoit                                                                                    | Hopital de Jolimont                                  | Haine-Saint-Paul | Belgium     |
| 1             | SIRFLOX        | Dr. Veerle Moons                                                                                         | Imelda Ziekenhuis                                    | Bonheiden        | Belgium     |
| 1             | SIRFLOX        | Dr. Michael Craninx                                                                                      | AZ Heilige Familie                                   | Reet             | Belgium     |
| 1             | SIRFLOX        | Dr. Michael Ferrante                                                                                     | AZ Sint-Maarten, Gastro-enterologie                  | Mechelen         | Belgium     |
| 1             | SIRFLOX        | Prof. Patrick Chevallier                                                                                 | HÔPITAL de l'Archet II                               | Nice             | France      |
| 1             | FOXFIRE Global | Dr. Richard Issacs                                                                                       | Palmerston North Hospital                            | Palmerston North | New Zealand |
| 1             | FOXFIRE Global | Dr. Andrew Strickland                                                                                    | South Eastern Hospital                               | Noble Park       | Australia   |
| 1             | FOXFIRE Global | Dr. Euan Walpole                                                                                         | Princess Alexandra Hospital                          | Woolloongabbaba  | Australia   |
| 1             | FOXFIRE Global | Prof. Christoph Bremer                                                                                   | St. Franziskus Hospital Muenster                     | Muenster         | Germany     |
| 1             | FOXFIRE Global | Prof. Marc Peeters                                                                                       | Antwerp University Hospital                          | Antwerp, Edegem  | Belgium     |
| 1             | FOXFIRE Global | Dr. Marc Polus                                                                                           | CHU Sart Tilman                                      | Liege            | Belgium     |
| 1             | FOXFIRE Global | Dr. Pascal Hammel<br>Prof. Sandrine Faivre (from 31Oct13 to 19Jun14)                                     | Hôpital Beaujon                                      | Clichy           | France      |
| 1             | FOXFIRE Global | Dr. Aurelie Durand<br>Dr. Christine Rebischung (from 04Oct13 to 16Aug 14)                                | Hôpital Albert Michallon                             | CHU Grenoble     | France      |
| 1             | FOXFIRE Global | Dr. Alex Beny                                                                                            | Rambam Health Care Campus                            | Haifa            | Israel      |
| 1             | FOXFIRE Global | Dr. Stefania Mosconi                                                                                     | Ospedali Riuniti di Bergamo                          | Bergamo          | Italy       |

| number of PTs | Study          | Principal Investigator                                                                                               | Hospital Name                                                             | City       | Country   |
|---------------|----------------|----------------------------------------------------------------------------------------------------------------------|---------------------------------------------------------------------------|------------|-----------|
| 1             | FOXFIRE Global | Dr. Federico Sanchez<br>Dr. Martin Crain<br>Dr. Jacob Frick (until 12Jan15)<br>Dr. Daniel Bloomgarden (until 1Jul14) | Aurora St. Luke's Medical Center                                          | Milwaukee  | USA       |
| 1             | FOXFIRE Global | Dr. Adeel Kaiser<br>Dr. Michael Chuong (from 6May15 to 28Jun15)<br>Dr. Navesh Sharma (until 06May15)                 | University of Maryland                                                    | Baltimore  | USA       |
| 1             | FOXFIRE Global | Dr. Eric Wang/Dr. Seungjean Chai<br>Dr. Frenette (until 30Jun16)<br>Dr. Steven Limentani (from 08Apr11 to 17Jul15)   | Carolinas Medical Center                                                  | Charlotte  | USA       |
| 1             | FOXFIRE Global | Dr. Mark Westcott/Lynn Ratner, MD                                                                                    | Lenox Hill Hospital                                                       | New York   | USA       |
| 1             | FOXFIRE Global | Patrick Boland<br>Renuka Iyer, MD (until 3Mar14)                                                                     | Roswell Park Cancer Institute                                             | Buffalo    | USA       |
| 1             | FOXFIRE Global | Dr. Miklos Auber<br>Patricia Stoltzfus, MD (until 30Apr15)                                                           | West Virginia University Healthcare                                       | Morgantown | USA       |
| 1             | FOXFIRE Global | Steven Ades, MD                                                                                                      | University of Vermont Medical Center (formerly Fletcher Allen Healthcare) | Burlington | USA       |
| 1             | FOXFIRE Global | Dr. Iain Tan                                                                                                         | National Cancer Centre                                                    | Singapore  | Singapore |
| 1             | FOXFIRE Global | Dr. Jin Hwang Liu                                                                                                    | Taipei Veterans General Hospital                                          | Taipei     | Taiwan    |

### Investigators/Trial Committees

**DSMC:** Stephen Ackland, Richard Wilson, Matthew Law, John Wagstaff, Desmond Yip and Gareth Griffiths

**TSC:** Mike Bradburn, William Allum and Leslie Samuel.

**The FOXFIRE Trial Management and Quality Assurance Group:** Adil Al-Nahhas, Dave Berry, Ian Chau, Luise Dunham, David Kerr, Nas Khan, Val Lewington, Rachel Midgley, Bruno Morgan, Sarah Pearson, Anne Roberts, Will Steward, Paul Tait, Greg Wilson, Andy Wotherspoon.

**FOXFIRE Health Economists:** Alastair Gray, Jane Wolstenholme.

**The FOXFIRE Study Group:** Richard Adams, Andrew Bateman, Claire Blesing, Ewan Brown, Ian Chau, Sebastian Cummins, David Cunningham, Stephen Falk, Maher Hadaki, Marcia Hall, Tamas Hickish, Joanne Hornbuckle, Fiona Lofts, Sarah Lowndes, Astrid Mayer, Matthew Metcalfe, Gary Middleton, Jamie Mills, Amir Montazeri, Rebecca Muirhead, Andreas Polychronis, Colin Purcell, Paul Ross, Liz Sherwin, David Smith, Rubin Soomal, Daniel Swinson, Axel Walther, Andrew Weaver, Charles Wilson, Greg Wilson. We would also like to thank the University of Oxford statistician Susan Dutton for her contribution to the FOXFIRE study.

**The SIRFLOX and FOXFIRE-Global Study Group:** Steven Ades, Morteza Aghmesheh, Pradip Amin, Bruna Angelelli, Miklos Auber, Jacques Balosso, Alex Beny, Daniel Bloomgarden, Patrick Boland, Eveline Boucher, Christoph Bremer, Michael Brown, Harald-Robert Bruch, James Bui, Matthew Burge, Giuseppe Cardaci, James

Carlisle, Ruiz Casado, Yi-Jen Chen, Patrick Chevallier, Michael Chuong, Stephen Clarke, Prasad Cooray, Andrew Coveler, Michel Craninx, Thierry Delanoit, Amélie Deleporte, Kyran Dowling, Aurelie Durand, Paul Eliadis, Francis Facchini, Kynan Feeney, Thomas Ferguson, Michel Ferrante, Aurelie Ferru, Michael Findlay, Maria Fragoso, Gary Frenette, Jacob Frick, Vinod Ganju, Michael Garofalo, Karen Geboes, Gerald Gehbauer, Benjamin George, Ravit Geva, Michael Gordon, Cristina Granetto, Kate Gregory, Seza Gulec, Pascal Hammel, James Hannigan, Norman Heching, Volker Heinemann, Thomas Helmberger, Alain Hendlisz, Koen Hendrickx, Matthew Holtzman, Ayala Hubert, Richard Isaacs, Christopher Jackson, Philip James, Adeel Kaiser, Chris Karapetis, Andreas Kaubisch, Yeul Hong Kim, Yon-Dschun Ko, Todd Kooy, Hendrik Kröning, Frank Lammert, Jin Tung Liang, Winston Liauw, Lionel Lim, Yoo Joo Lim, Jin Hwang Liu, Samy Louafi, Marc de Man, Jeffrey Margolis, Robert Martin, Andrea Martoni, Gavin Marx, Marco Matos, Els Monsaert, Veerle Moons, Stefania Mosconi, Louise Nott, Arnd Nusch, Anne O'Donnell, Howard Ozer, Siddarth Padia, Nick Pavlakis, Marc Peeters, David Perez, Stefan Pluntke, Marc Polus, Alex Powell, Marc Pracht, Timothy Price, Jorge Ramon, David Ransom, Christine Rebischung, Jens Ricke, Karsten Ridwelski, Hanno Riess, Jorge Ramon Riera, William Rilling, Bridget Robinson, Javier Rodríguez, Federico Sanchez, Tilmann Sauerbruch, Michael Savin, Klemens Scheidhauer, Elyse Schneiderman, Grant Seeger, Eva Segelov, Einat Shaham Schmueli, Adi Shani, Jenny Shannon, Navesh Sharma, Stephen Shibata, Nimit Singhal, Denis Smith, Randall Smith, Salomon Stemmer, Oliver Stötzer, Andrew Strickland, Julien Taieb, Iain Tan, Klaus Tatsch, Eric Terrebonne, Thomas Tichler, Antonio Trogu, Craig Underhill, Daniel Van Daele, Ursula Vehling-Kaiser, Ruth Vera-Garcia, Caterina Vivaldi, Thomas Vogl, Euan Walpole, Eric Wang, Mark Westcott, Samuel Whiting, Ido Wolf.
